# Supplementary material
Source: publisher figshare collection journal article supplement (https://acs.figshare.com/ndownloader/files/36576831)
Supplement: Supplementary file 1 [file 36576831]

## Sheet: Random Seed 1
		Hyperparameters						Accuracy Values
								Questions
		Spectra Trimming	Activation function	Learning rate	Input size	Neurons in hidden layer	Batch size	1	2	3	4	5	6
		no trim	ReLU	0.001	40*40	50	50	94.6676	100	97.6965	75.7931	93.5278	78.9244
		no trim	ReLU	0.001	40*40	50	100	96.0864	100	97.7363	74.2547	92.8344	77.7815
		no trim	ReLU	0.001	40*40	50	500	95.0662	100	97.3697	73.0352	92.2844	76.9412
		no trim	ReLU	0.001	40*40	100	50	95.6002	100	97.8878	75.7453	93.4959	79.3838
		no trim	ReLU	0.001	40*40	100	100	97.4892	100	97.3697	76.8213	94.2133	79.3613
		no trim	ReLU	0.001	40*40	100	500	94.7473	100	97.832	76.0641	92.4597	76.549
		no trim	ReLU	0.001	40*40	200	50	97.3298	100	97.5291	81.1255	94.3727	81.0868
		no trim	ReLU	0.001	40*40	200	100	95.9589	100	97.1226	79.6429	93.8466	77.2213
		no trim	ReLU	0.001	40*40	200	500	96.5567	100	96.9472	76.8851	92.659	78.2297
		no trim	ReLU	0.001	40*40	500	50	97.1864	100	97.274	81.0936	94.4285	78.2409
		no trim	ReLU	0.001	40*40	500	100	96.8914	100	97.4574	79.3241	94.4684	80.9412
		no trim	ReLU	0.001	40*40	500	500	96.8117	100	97.2501	77.5626	94.0061	78.8123
		no trim	ReLU	0.001	50*50	50	50	96.5168	100	97.832	75.6656	93.5836	77.7143
		no trim	ReLU	0.001	50*50	50	100	95.5125	100	98.4537	75.4663	92.7865	76.7395
		no trim	ReLU	0.001	50*50	50	500	94.2771	100	97.9515	75.3945	91.1286	77.0308
		no trim	ReLU	0.001	50*50	100	50	97.7124	100	97.3458	77.9212	93.6872	78.8683
		no trim	ReLU	0.001	50*50	100	100	96.6284	100	97.9994	77.1561	94.6995	78.7115
		no trim	ReLU	0.001	50*50	100	500	95.2575	100	97.7044	77.2119	93.1452	79.563
		no trim	ReLU	0.001	50*50	200	50	96.3733	100	97.2581	78.1285	94.4444	80.986
		no trim	ReLU	0.001	50*50	200	100	96.1183	100	97.0269	76.6938	93.8945	79.7759
		no trim	ReLU	0.001	50*50	200	500	96.1741	100	97.282	75.8967	93.7829	78.8011
		no trim	ReLU	0.001	50*50	500	50	97.8798	100	97.2581	79.611	94.2771	79.9664
		no trim	ReLU	0.001	50*50	500	100	96.8835	100	97.3139	76.0083	94.9307	80.3249
		no trim	ReLU	0.001	50*50	500	500	96.5806	100	97.4175	76.893	93.7908	78.9244
		no trim	ReLU	0.001	60*60	50	50	96.8197	100	96.9632	75.1953	93.193	80.3361
		no trim	ReLU	0.001	60*60	50	100	95.919	100	97.2421	78.6864	93.5198	79.0252
		no trim	ReLU	0.001	60*60	50	500	95.6161	100	96.8038	70.9629	92.0772	77.9384
		no trim	ReLU	0.001	60*60	100	50	95.8632	100	97.7443	77.706	94.5242	77.8039
		no trim	ReLU	0.001	60*60	100	100	97.7602	100	97.8479	77.5387	94.0858	77.972
		no trim	ReLU	0.001	60*60	100	500	96.0784	100	97.8081	76.3112	93.6793	78.2521
		no trim	ReLU	0.001	60*60	200	50	94.8828	100	97.5769	77.0285	95.5683	78.2857
		no trim	ReLU	0.001	60*60	200	100	96.8914	100	97.0429	76.4307	94.6517	77.1429
		no trim	ReLU	0.001	60*60	200	500	96.3494	100	97.3777	76.5662	93.9264	78.9804
		no trim	ReLU	0.001	60*60	500	50	97.9755	100	97.6407	76.2235	94.6039	78.8571
		no trim	ReLU	0.001	60*60	500	100	95.64	100	97.1385	77.8734	95.369	79.1036
		no trim	ReLU	0.001	60*60	500	500	96.4371	100	97.274	76.63	94.1894	78.2521
		no trim	ReLU	0.0001	40*40	50	50	93.6474	100	97.7204	73.5932	91.033	78.4874
		no trim	ReLU	0.0001	40*40	50	100	93.0655	100	97.2262	70.9788	88.2911	77.7031
		no trim	ReLU	0.0001	40*40	50	500	90.1323	100	96.5886	68.8745	77.4669	77.2437
		no trim	ReLU	0.0001	40*40	100	50	94.572	100	98.1428	72.015	92.109	77.6134
		no trim	ReLU	0.0001	40*40	100	100	94.7154	100	97.6407	75.2989	90.9772	77.6246
		no trim	ReLU	0.0001	40*40	100	500	91.2482	100	96.8277	70.5324	82.2573	77.1092
		no trim	ReLU	0.0001	40*40	200	50	95.8871	100	97.824	77.6104	92.7148	78.2185
		no trim	ReLU	0.0001	40*40	200	100	95.4567	100	97.7602	77.8415	92.1569	78.1513
		no trim	ReLU	0.0001	40*40	200	500	93.193	100	97.3617	71.5925	84.9354	77.5798
		no trim	ReLU	0.0001	40*40	500	50	96.6125	100	97.5371	77.2756	93.5198	77.7703
		no trim	ReLU	0.0001	40*40	500	100	96.1821	100	97.4494	78.3517	93.3764	79.2941
		no trim	ReLU	0.0001	40*40	500	500	94.6676	100	97.5052	74.47	88.7135	77.0644
		no trim	ReLU	0.0001	50*50	50	50	94.3488	100	97.9515	76.8293	91.5431	76.3922
		no trim	ReLU	0.0001	50*50	50	100	93.3684	100	97.8718	72.9396	89.8852	77.535
		no trim	ReLU	0.0001	50*50	50	500	90.7142	100	96.6204	69.1934	78.814	77.8599
		no trim	ReLU	0.0001	50*50	100	50	95.0183	100	97.6487	76.4387	91.9895	77.8824
		no trim	ReLU	0.0001	50*50	100	100	95.1299	100	97.9037	72.6845	91.1127	77.7591
		no trim	ReLU	0.0001	50*50	100	500	92.651	100	97.1465	71.2737	84.8717	76.1793
		no trim	ReLU	0.0001	50*50	200	50	96.1263	100	97.9356	77.0764	93.5119	78.9356
		no trim	ReLU	0.0001	50*50	200	100	95.5763	100	97.6088	77.2836	92.6431	78.2633
		no trim	ReLU	0.0001	50*50	200	500	93.2728	100	97.5052	72.541	86.8723	77.2213
		no trim	ReLU	0.0001	50*50	500	50	97.7284	100	97.7204	80.0972	93.0336	78.6779
		no trim	ReLU	0.0001	50*50	500	100	97.4574	100	97.3059	79.6429	92.4757	79.0812
		no trim	ReLU	0.0001	50*50	500	500	95.098	100	97.1465	73.9439	90.0446	76.9972
		no trim	ReLU	0.0001	60*60	50	50	95.4089	100	97.9117	74.8844	92.4199	77.8599
		no trim	ReLU	0.0001	60*60	50	100	94.4205	100	97.816	73.8562	91.4714	78.6331
		no trim	ReLU	0.0001	60*60	50	500	91.2641	100	97.1066	68.2927	83.8913	76.2689
		no trim	ReLU	0.0001	60*60	100	50	95.4647	100	98.0711	76.7336	92.7068	77.4342
		no trim	ReLU	0.0001	60*60	100	100	94.6915	100	97.7523	76.8213	92.8264	78.0056
		no trim	ReLU	0.0001	60*60	100	500	91.5112	100	97.4733	71.7838	86.3383	77.9048
		no trim	ReLU	0.0001	60*60	200	50	96.7878	100	97.2421	76.9568	93.6872	78.9804
		no trim	ReLU	0.0001	60*60	200	100	95.3053	100	97.2581	75.1076	92.6192	77.3333
		no trim	ReLU	0.0001	60*60	200	500	93.4242	100	97.2262	73.7127	88.3708	78.3305
		no trim	ReLU	0.0001	60*60	500	50	97.3697	100	97.4016	76.5662	93.9104	79.4286
		no trim	ReLU	0.0001	60*60	500	100	97.0429	100	97.561	78.0169	93.2488	79.2493
		no trim	ReLU	0.0001	60*60	500	500	94.8031	100	97.6566	74.6692	91.6547	77.4454
		no trim	ReLU	0.01	40*40	50	50	97.7044	100	96.3813	71.4889	93.0496	75.7759
		no trim	ReLU	0.01	40*40	50	100	95.7835	100	97.2262	74.8924	94.6118	79.1261
		no trim	ReLU	0.01	40*40	50	500	95.648	100	98.2704	76.3431	93.9184	79.9776
		no trim	ReLU	0.01	40*40	100	50	95.6241	100	96.5328	77.9372	94.4763	78.577
		no trim	ReLU	0.01	40*40	100	100	97.9197	100	97.1864	81.0218	94.2611	77.4566
		no trim	ReLU	0.01	40*40	100	500	96.7559	100	97.7204	79.8262	94.3807	79.1821
		no trim	ReLU	0.01	40*40	200	50	94.1336	100	96.4849	76.0641	93.2887	77.9384
		no trim	ReLU	0.01	40*40	200	100	97.5211	100	97.3059	74.0316	94.6278	79.6863
		no trim	ReLU	0.01	40*40	200	500	97.3936	100	97.9037	75.3388	93.4959	80.1232
		no trim	ReLU	0.01	40*40	500	50	97.6965	100	96.4132	68.2927	93.3525	78.1625
		no trim	ReLU	0.01	40*40	500	100	98.0312	100	97.282	76.9169	94.1256	79.3277
		no trim	ReLU	0.01	40*40	500	500	97.545	100	97.3856	80.2327	93.3923	77.5238
		no trim	ReLU	0.01	50*50	50	50	98.2146	100	97.019	68.2927	93.193	79.563
		no trim	ReLU	0.01	50*50	50	100	96.1263	100	97.1146	75.0678	94.0459	80.4594
		no trim	ReLU	0.01	50*50	50	500	96.7799	100	96.6204	80.2088	93.3764	78.6667
		no trim	ReLU	0.01	50*50	100	50	95.664	100	97.29	68.2927	93.1373	78.6555
		no trim	ReLU	0.01	50*50	100	100	96.5886	100	97.4334	74.7808	94.0061	73.4454
		no trim	ReLU	0.01	50*50	100	500	97.274	100	97.5689	80.5755	93.2568	77.7703
		no trim	ReLU	0.01	50*50	200	50	97.1784	100	96.9632	68.2927	94.0858	79.944
		no trim	ReLU	0.01	50*50	200	100	98.1747	100	96.9472	75.0518	93.759	75.2045
		no trim	ReLU	0.01	50*50	200	500	97.5211	100	97.6407	75.4822	94.9307	82.2745
		no trim	ReLU	0.01	50*50	500	50	98.0233	100	97.3298	74.8127	93.7749	79.5966
		no trim	ReLU	0.01	50*50	500	100	97.5371	100	96.7639	79.4436	92.6112	80.8627
		no trim	ReLU	0.01	50*50	500	500	96.4212	100	97.4574	74.5576	93.8227	79.6078
		no trim	ReLU	0.01	60*60	50	50	96.3733	100	97.5291	68.2927	94.9546	78.6331
		no trim	ReLU	0.01	60*60	50	100	97.0668	100	97.3936	74.717	95.1379	81.2661
		no trim	ReLU	0.01	60*60	50	500	97.2421	100	97.29	79.9777	93.1054	78.5322
		no trim	ReLU	0.01	60*60	100	50	97.6726	100	96.7559	68.2927	92.2924	79.4734
		no trim	ReLU	0.01	60*60	100	100	97.816	100	97.6327	68.2927	93.8148	79.3165
		no trim	ReLU	0.01	60*60	100	500	97.3458	100	97.8081	72.3657	94.556	79.2941
		no trim	ReLU	0.01	60*60	200	50	98.358	100	96.3415	68.2927	93.6474	76.4706
		no trim	ReLU	0.01	60*60	200	100	96.6683	100	98.1428	75.1395	91.9257	75.395
		no trim	ReLU	0.01	60*60	200	500	97.9117	100	97.5132	79.8103	94.014	78.3193
		no trim	ReLU	0.01	60*60	500	50	97.5052	100	96.3255	68.2927	94.3408	76.6387
		no trim	ReLU	0.01	60*60	500	100	98.087	100	95.8871	74.9482	94.5879	77.8151
		no trim	ReLU	0.01	60*60	500	500	97.3298	100	97.4972	75.1475	94.3966	79.4398
		no trim	Leaky ReLU	0.001	40*40	50	50	98.0233	100	97.4494	81.7153	94.1416	78.6331
		no trim	Leaky ReLU	0.001	40*40	50	100	97.8559	100	97.0349	82.4167	94.1017	79.1373
		no trim	Leaky ReLU	0.001	40*40	50	500	96.5886	100	97.0748	78.7741	93.0735	78.9244
		no trim	Leaky ReLU	0.001	40*40	100	50	97.5849	100	97.0907	81.9863	93.8945	78.0168
		no trim	Leaky ReLU	0.001	40*40	100	100	97.6566	100	97.4813	80.695	94.1336	79.014
		no trim	Leaky ReLU	0.001	40*40	100	500	96.3335	100	97.6088	81.8109	93.201	78.028
		no trim	Leaky ReLU	0.001	40*40	200	50	98.3341	100	97.0668	84.4492	94.9546	78.577
		no trim	Leaky ReLU	0.001	40*40	200	100	98.3182	100	97.3219	80.6871	94.7154	78.9692
		no trim	Leaky ReLU	0.001	40*40	200	500	97.3219	100	97.3777	79.3161	93.7669	78.6443
		no trim	Leaky ReLU	0.001	40*40	500	50	97.5929	100	96.8675	83.3413	93.9662	79.7423
		no trim	Leaky ReLU	0.001	40*40	500	100	97.9197	100	97.816	79.1886	94.4923	78.8683
		no trim	Leaky ReLU	0.001	40*40	500	500	96.7878	100	97.4494	80.0016	94.0698	79.5518
		no trim	Leaky ReLU	0.001	50*50	50	50	98.1508	100	96.6364	83.2855	94.8589	80.7283
		no trim	Leaky ReLU	0.001	50*50	50	100	97.7204	100	96.1821	77.706	94.2691	80.3361
		no trim	Leaky ReLU	0.001	50*50	50	500	96.19	100	97.5929	77.3872	92.7945	78.4314
		no trim	Leaky ReLU	0.001	50*50	100	50	98.1907	100	97.282	81.795	94.0379	80.1681
		no trim	Leaky ReLU	0.001	50*50	100	100	98.103	100	97.4016	82.2095	95.2256	80.8067
		no trim	Leaky ReLU	0.001	50*50	100	500	97.6088	100	97.3697	77.451	92.9778	77.7927
		no trim	Leaky ReLU	0.001	50*50	200	50	97.7124	100	96.9632	82.6319	94.7394	77.5014
		no trim	Leaky ReLU	0.001	50*50	200	100	97.7443	100	97.2501	81.0378	95.0104	79.7311
		no trim	Leaky ReLU	0.001	50*50	200	500	97.9197	100	97.1226	80.5037	93.1851	78.8123
		no trim	Leaky ReLU	0.001	50*50	500	50	98.0233	100	97.5371	80.2248	95.114	79.5518
		no trim	Leaky ReLU	0.001	50*50	500	100	90.8895	100	97.3856	82.0421	94.7712	79.1373
		no trim	Leaky ReLU	0.001	50*50	500	500	97.2501	100	97.3219	81.5081	94.2691	80.2689
		no trim	Leaky ReLU	0.001	60*60	50	50	97.6407	100	97.3458	79.1089	94.3568	77.6807
		no trim	Leaky ReLU	0.001	60*60	50	100	97.4255	100	97.0349	82.6	94.1416	76.8627
		no trim	Leaky ReLU	0.001	60*60	50	500	97.7284	100	98.0153	78.6386	93.488	78.6106
		no trim	Leaky ReLU	0.001	60*60	100	50	98.358	100	97.6247	84.2818	94.0539	79.1597
		no trim	Leaky ReLU	0.001	60*60	100	100	97.8081	100	97.5132	79.7226	93.9024	80.3922
		no trim	Leaky ReLU	0.001	60*60	100	500	98.0631	100	96.9074	81.1255	93.3525	79.451
		no trim	Leaky ReLU	0.001	60*60	200	50	98.2066	100	97.8957	75.9286	95.2256	78.7787
		no trim	Leaky ReLU	0.001	60*60	200	100	97.5689	100	97.274	80.0016	94.4763	80.112
		no trim	Leaky ReLU	0.001	60*60	200	500	98.0073	100	96.9074	78.4633	93.9104	79.3165
		no trim	Leaky ReLU	0.001	60*60	500	50	98.1508	100	97.1066	83.0783	94.843	79.7871
		no trim	Leaky ReLU	0.001	60*60	500	100	97.8639	100	97.3617	81.1095	94.6756	79.4734
		no trim	Leaky ReLU	0.001	60*60	500	500	97.5849	100	97.3139	82.0421	94.3329	77.9832
		no trim	Leaky ReLU	0.0001	40*40	50	50	95.8712	100	97.6327	75.6416	90.5308	78.0952
		no trim	Leaky ReLU	0.0001	40*40	50	100	93.9821	100	97.5371	75.2431	89.5664	78.2857
		no trim	Leaky ReLU	0.0001	40*40	50	500	90.4751	100	96.8117	69.6636	77.5307	76.2801
		no trim	Leaky ReLU	0.0001	40*40	100	50	96.7639	100	97.8399	77.6263	93.2488	78.902
		no trim	Leaky ReLU	0.0001	40*40	100	100	95.7198	100	97.561	74.8924	92.0612	77.5462
		no trim	Leaky ReLU	0.0001	40*40	100	500	91.9735	100	97.003	70.2774	82.2334	77.098
		no trim	Leaky ReLU	0.0001	40*40	200	50	95.7915	100	97.8639	79.5313	92.667	77.1989
		no trim	Leaky ReLU	0.0001	40*40	200	100	96.4451	100	97.6646	74.0156	92.0054	78.4202
		no trim	Leaky ReLU	0.0001	40*40	200	500	93.3206	100	97.1545	72.8041	85.9079	77.6022
		no trim	Leaky ReLU	0.0001	40*40	500	50	97.6008	100	97.545	76.4945	93.2807	78.2969
		no trim	Leaky ReLU	0.0001	40*40	500	100	97.0827	100	97.7682	80.5037	93.0336	77.4118
		no trim	Leaky ReLU	0.0001	40*40	500	500	95.5524	100	97.1943	73.0591	88.865	77.0868
		no trim	Leaky ReLU	0.0001	50*50	50	50	96.2538	100	97.6805	78.5669	91.7424	77.1989
		no trim	Leaky ReLU	0.0001	50*50	50	100	95.0741	100	97.6407	74.6453	89.662	76.986
		no trim	Leaky ReLU	0.0001	50*50	50	500	91.5033	100	96.6762	70.1817	80.5994	77.535
		no trim	Leaky ReLU	0.0001	50*50	100	50	95.919	100	97.1226	79.4516	93.1373	78.6779
		no trim	Leaky ReLU	0.0001	50*50	100	100	96.2538	100	97.553	77.0604	92.6431	77.7255
		no trim	Leaky ReLU	0.0001	50*50	100	500	93.4401	100	97.3059	71.4491	85.0789	77.0756
		no trim	Leaky ReLU	0.0001	50*50	200	50	96.8994	100	97.3856	79.9458	92.3641	77.7143
		no trim	Leaky ReLU	0.0001	50*50	200	100	96.5407	100	97.8001	78.001	92.7228	77.6695
		no trim	Leaky ReLU	0.0001	50*50	200	500	94.5401	100	97.6168	73.4417	87.6614	77.3333
		no trim	Leaky ReLU	0.0001	50*50	500	50	97.3298	100	97.0429	82.8949	93.7271	78.7451
		no trim	Leaky ReLU	0.0001	50*50	500	100	97.8081	100	97.1864	76.1836	93.2329	77.7815
		no trim	Leaky ReLU	0.0001	50*50	500	500	96.2697	100	97.7044	74.8446	91.1286	77.3669
		no trim	Leaky ReLU	0.0001	60*60	50	50	96.5567	100	98.0631	77.6263	92.1648	77.2325
		no trim	Leaky ReLU	0.0001	60*60	50	100	95.4567	100	97.816	73.3142	92.3083	78.2073
		no trim	Leaky ReLU	0.0001	60*60	50	500	91.4634	100	97.2023	70.3252	83.2297	77.8487
		no trim	Leaky ReLU	0.0001	60*60	100	50	96.6364	100	96.9552	78.519	93.1452	77.8487
		no trim	Leaky ReLU	0.0001	60*60	100	100	95.8393	100	97.5371	77.8336	92.5634	79.0252
		no trim	Leaky ReLU	0.0001	60*60	100	500	94.572	100	97.4653	72.9794	86.6093	76.7171
		no trim	Leaky ReLU	0.0001	60*60	200	50	97.6726	100	97.3458	79.1966	93.3445	78.2633
		no trim	Leaky ReLU	0.0001	60*60	200	100	97.2979	100	97.5929	79.0212	92.93	78.1176
		no trim	Leaky ReLU	0.0001	60*60	200	500	95.5603	100	97.6168	74.5576	89.2396	78.1513
		no trim	Leaky ReLU	0.0001	60*60	500	50	97.6487	100	97.0668	83.2935	93.9503	78.0392
		no trim	Leaky ReLU	0.0001	60*60	500	100	97.9436	100	97.6008	80.3523	93.5198	78.028
		no trim	Leaky ReLU	0.0001	60*60	500	500	95.9828	100	97.4334	76.7256	91.6467	77.4902
		no trim	Leaky ReLU	0.01	40*40	50	50	96.8755	100	97.4892	81.7233	93.0735	80.5714
		no trim	Leaky ReLU	0.01	40*40	50	100	96.0226	100	97.4255	78.2002	94.9785	76.4594
		no trim	Leaky ReLU	0.01	40*40	50	500	96.8038	100	97.7523	77.6104	94.1974	81.0084
		no trim	Leaky ReLU	0.01	40*40	100	50	97.6008	100	96.5965	79.89	93.8785	77.0532
		no trim	Leaky ReLU	0.01	40*40	100	100	98.3341	100	96.9711	82.6399	93.9423	79.014
		no trim	Leaky ReLU	0.01	40*40	100	500	96.3335	100	97.7124	79.9617	94.5401	79.8095
		no trim	Leaky ReLU	0.01	40*40	200	50	97.8798	100	96.6762	77.2437	93.472	77.7591
		no trim	Leaky ReLU	0.01	40*40	200	100	98.2305	100	97.0748	78.5988	94.3169	78.8796
		no trim	Leaky ReLU	0.01	40*40	200	500	96.8356	100	97.7682	77.2756	94.1894	77.423
		no trim	Leaky ReLU	0.01	40*40	500	50	97.7682	100	96.8755	82.1776	93.9901	78.4202
		no trim	Leaky ReLU	0.01	40*40	500	100	97.545	100	96.8117	84.0587	93.3684	77.7255
		no trim	Leaky ReLU	0.01	40*40	500	500	98.0711	100	97.4016	82.8471	93.2329	76.3922
		no trim	Leaky ReLU	0.01	50*50	50	50	97.8001	100	96.8117	75.7054	93.3206	78.028
		no trim	Leaky ReLU	0.01	50*50	50	100	98.5573	100	97.0827	80.4719	93.9742	78.9468
		no trim	Leaky ReLU	0.01	50*50	50	500	95.369	100	97.9037	82.1457	93.9423	79.3613
		no trim	Leaky ReLU	0.01	50*50	100	50	98.1508	100	96.477	79.7704	94.0459	77.7927
		no trim	Leaky ReLU	0.01	50*50	100	100	97.3697	100	96.7241	80.4878	92.0453	76.7731
		no trim	Leaky ReLU	0.01	50*50	100	500	97.2421	100	97.7921	81.8269	93.7669	79.9888
		no trim	Leaky ReLU	0.01	50*50	200	50	94.0937	100	96.2378	77.7937	91.7504	79.6078
		no trim	Leaky ReLU	0.01	50*50	200	100	98.2146	100	97.0987	79.2922	92.8423	80.1569
		no trim	Leaky ReLU	0.01	50*50	200	500	97.4813	100	97.4334	81.0059	93.9662	77.6134
		no trim	Leaky ReLU	0.01	50*50	500	50	97.274	100	96.7639	78.2799	92.8902	80.3025
		no trim	Leaky ReLU	0.01	50*50	500	100	95.8074	100	96.6443	81.532	93.7749	79.7311
		no trim	Leaky ReLU	0.01	50*50	500	500	97.9037	100	92.6829	77.5945	93.3843	79.4958
		no trim	Leaky ReLU	0.01	60*60	50	50	97.8399	100	96.748	74.0794	93.6474	79.0028
		no trim	Leaky ReLU	0.01	60*60	50	100	97.6247	100	96.8914	80.9023	89.4468	77.6471
		no trim	Leaky ReLU	0.01	60*60	50	500	97.282	100	97.29	81.3008	94.3249	79.8768
		no trim	Leaky ReLU	0.01	60*60	100	50	97.7443	100	96.7958	79.2364	94.0061	77.8711
		no trim	Leaky ReLU	0.01	60*60	100	100	96.3176	100	97.2661	79.5473	93.8546	79.2269
		no trim	Leaky ReLU	0.01	60*60	100	500	97.4334	100	97.8559	80.5516	94.1256	79.9328
		no trim	Leaky ReLU	0.01	60*60	200	50	98.7008	100	96.461	74.0316	93.3445	79.6639
		no trim	Leaky ReLU	0.01	60*60	200	100	97.6407	100	96.5248	78.7343	94.0619	77.8936
		no trim	Leaky ReLU	0.01	60*60	200	500	97.824	100	97.3777	80.7429	94.3966	80.6275
		no trim	Leaky ReLU	0.01	60*60	500	50	98.0233	100	96.6523	81.2211	94.2691	79.7087
		no trim	Leaky ReLU	0.01	60*60	500	100	97.1943	100	96.9552	80.1451	94.5162	76.4706
		no trim	Leaky ReLU	0.01	60*60	500	500	97.9356	100	97.3219	82.9428	94.3727	70.2185
		95% trim	ReLU	0.001	40*40	50	50	96.0545	99.992	94.022	67.6471	87.6694	88.0896
		95% trim	ReLU	0.001	40*40	50	100	95.0104	99.992	93.3286	67.8065	87.5658	90.2969
		95% trim	ReLU	0.001	40*40	50	500	94.0778	99.992	92.9778	68.5796	85.2941	90.6555
		95% trim	ReLU	0.001	40*40	100	50	94.014	99.9841	94.9705	67.7586	87.4542	88.605
		95% trim	ReLU	0.001	40*40	100	100	95.3611	99.992	95.4089	67.3282	86.9919	87.9104
		95% trim	ReLU	0.001	40*40	100	500	95.369	100	93.48	69.8151	86.7687	90.0728
		95% trim	ReLU	0.001	40*40	200	50	96.7799	100	95.4806	68.4441	86.5455	89.2773
		95% trim	ReLU	0.001	40*40	200	100	94.7075	100	95.2654	67.2963	88.8969	90.028
		95% trim	ReLU	0.001	40*40	200	500	95.0741	99.992	94.4285	69.3687	87.3824	90.3641
		95% trim	ReLU	0.001	40*40	500	50	96.0944	99.992	96.19	68.3086	90.1243	88.9636
		95% trim	ReLU	0.001	40*40	500	100	95.6958	99.992	95.7437	68.6514	86.96	89.0196
		95% trim	ReLU	0.001	40*40	500	500	95.648	99.992	95.5045	69.4405	88.5701	89.7927
		95% trim	ReLU	0.001	50*50	50	50	95.0502	100	94.7473	67.671	86.5375	88.8964
		95% trim	ReLU	0.001	50*50	50	100	93.9503	99.992	94.3249	68.0376	86.2984	88.0896
		95% trim	ReLU	0.001	50*50	50	500	92.6431	99.992	93.3764	66.5073	86.2825	89.5574
		95% trim	ReLU	0.001	50*50	100	50	95.6321	100	94.9227	66.9616	87.765	88.4594
		95% trim	ReLU	0.001	50*50	100	100	96.469	99.9761	94.6676	66.9217	87.0397	89.9496
		95% trim	ReLU	0.001	50*50	100	500	95.377	100	93.8466	67.0413	86.8165	90.6891
		95% trim	ReLU	0.001	50*50	200	50	95.9509	100	95.7596	68.9702	88.7693	90.2745
		95% trim	ReLU	0.001	50*50	200	100	95.8871	99.992	95.2893	69.1057	88.2911	90.2857
		95% trim	ReLU	0.001	50*50	200	500	95.8632	100	94.8828	68.1891	87.8049	90.8011
		95% trim	ReLU	0.001	50*50	500	50	94.2691	99.9841	95.4567	68.9782	89.5664	89.7591
		95% trim	ReLU	0.001	50*50	500	100	96.0545	99.992	95.3372	69.305	89.0403	89.1653
		95% trim	ReLU	0.001	50*50	500	500	94.8191	99.992	95.1379	69.7115	86.952	90.9916
		95% trim	ReLU	0.001	60*60	50	50	94.3408	100	94.1894	67.7268	87.2948	88.5602
		95% trim	ReLU	0.001	60*60	50	100	93.201	99.992	95.2893	67.6949	87.0238	88.0112
		95% trim	ReLU	0.001	60*60	50	500	93.48	99.992	92.9061	68.0217	86.3303	88.9636
		95% trim	ReLU	0.001	60*60	100	50	95.4487	100	95.3451	68.755	87.6216	88.2689
		95% trim	ReLU	0.001	60*60	100	100	96.1502	99.992	95.9987	67.5116	88.315	87.5294
		95% trim	ReLU	0.001	60*60	100	500	94.5002	100	93.4561	67.1927	87.5976	89.5126
		95% trim	ReLU	0.001	60*60	200	50	94.5082	100	96.1502	68.1731	88.4266	88.1345
		95% trim	ReLU	0.001	60*60	200	100	94.3568	99.992	95.3372	68.3644	87.5976	88.3585
		95% trim	ReLU	0.001	60*60	200	500	94.9147	100	94.0698	67.4319	87.8368	91.0252
		95% trim	ReLU	0.001	60*60	500	50	95.9031	99.992	95.7915	68.3485	89.2396	89.2885
		95% trim	ReLU	0.001	60*60	500	100	94.1734	99.992	95.8074	69.4405	89.7657	88.8179
		95% trim	ReLU	0.001	60*60	500	500	95.3132	100	94.5879	68.2209	87.7889	88.493
		95% trim	ReLU	0.0001	40*40	50	50	93.7351	100	93.4242	67.384	84.3137	91.3389
		95% trim	ReLU	0.0001	40*40	50	100	92.3402	99.992	93.1452	67.392	83.1261	89.5462
		95% trim	ReLU	0.0001	40*40	50	500	90.3953	99.9601	90.7939	68.0695	78.0568	87.0252
		95% trim	ReLU	0.0001	40*40	100	50	94.1814	99.992	93.7829	67.0811	85.589	90.0616
		95% trim	ReLU	0.0001	40*40	100	100	93.9024	99.992	93.488	66.9297	84.513	90.8235
		95% trim	ReLU	0.0001	40*40	100	500	91.6786	99.992	91.2881	67.9021	81.5798	88.6387
		95% trim	ReLU	0.0001	40*40	200	50	95.1937	99.992	94.2531	67.663	86.8085	90.7899
		95% trim	ReLU	0.0001	40*40	200	100	94.7952	99.992	93.6713	67.3601	85.5651	91.4622
		95% trim	ReLU	0.0001	40*40	200	500	92.7308	99.992	92.6032	67.4079	82.3848	89.9384
		95% trim	ReLU	0.0001	40*40	500	50	96.1581	99.992	94.556	67.8065	86.968	89.9272
		95% trim	ReLU	0.0001	40*40	500	100	95.7198	99.992	94.4923	68.1412	86.8245	90.7003
		95% trim	ReLU	0.0001	40*40	500	500	94.0459	99.992	93.1133	66.3399	84.3456	91.888
		95% trim	ReLU	0.0001	50*50	50	50	92.675	99.992	93.209	68.6992	85.2463	90.8235
		95% trim	ReLU	0.0001	50*50	50	100	92.388	99.992	92.7547	67.4797	83.971	91.3389
		95% trim	ReLU	0.0001	50*50	50	500	91.3439	99.992	91.2402	67.9978	80.0175	88.7283
		95% trim	ReLU	0.0001	50*50	100	50	93.6314	99.992	92.9858	67.7427	86.6412	91.1261
		95% trim	ReLU	0.0001	50*50	100	100	93.2488	99.992	92.7706	68.0775	84.8796	90.3529
		95% trim	ReLU	0.0001	50*50	100	500	92.4438	99.992	91.8699	67.7826	81.8189	89.5126
		95% trim	ReLU	0.0001	50*50	200	50	95.656	99.992	94.1336	67.6152	87.773	90.1961
		95% trim	ReLU	0.0001	50*50	200	100	95.3212	99.992	93.5916	67.5913	86.3064	91.395
		95% trim	ReLU	0.0001	50*50	200	500	93.3046	99.992	92.8105	67.3282	83.0703	91.944
		95% trim	ReLU	0.0001	50*50	500	50	95.8712	99.992	95.7437	67.7427	87.6375	91.2829
		95% trim	ReLU	0.0001	50*50	500	100	95.5444	99.992	95.0662	67.392	87.5498	91.0588
		95% trim	ReLU	0.0001	50*50	500	500	94.3966	99.9841	93.3684	66.8898	84.6246	91.395
		95% trim	ReLU	0.0001	60*60	50	50	92.8105	99.992	92.3721	67.5036	86.2107	90.4874
		95% trim	ReLU	0.0001	60*60	50	100	92.7626	100	92.0054	67.1369	84.3615	91.8768
		95% trim	ReLU	0.0001	60*60	50	500	91.5909	99.992	90.9453	68.1253	80.7508	89.1204
		95% trim	ReLU	0.0001	60*60	100	50	93.6314	99.992	93.0735	67.5355	86.6013	89.6471
		95% trim	ReLU	0.0001	60*60	100	100	93.0655	99.992	92.6112	67.6311	86.1709	90.5882
		95% trim	ReLU	0.0001	60*60	100	500	92.4757	99.992	91.0489	68.2767	82.7913	90.1849
		95% trim	ReLU	0.0001	60*60	200	50	95.0901	99.992	94.2133	66.842	88.3867	90.0504
		95% trim	ReLU	0.0001	60*60	200	100	94.3169	99.992	93.9981	68.0376	86.7288	90.9356
		95% trim	ReLU	0.0001	60*60	200	500	93.3445	99.992	92.4438	67.3761	84.4333	91.2269
		95% trim	ReLU	0.0001	60*60	500	50	95.0662	99.992	95.3212	66.8659	87.8926	90.1737
		95% trim	ReLU	0.0001	60*60	500	100	95.377	99.992	94.843	66.6587	86.5535	90.4314
		95% trim	ReLU	0.0001	60*60	500	500	94.1256	99.992	93.5756	66.6985	85.7484	92.2801
		95% trim	ReLU	0.01	40*40	50	50	95.6879	99.992	95.2096	68.2927	87.9643	89.1765
		95% trim	ReLU	0.01	40*40	50	100	94.6517	99.992	94.6357	68.2927	87.5418	88.6387
		95% trim	ReLU	0.01	40*40	50	500	95.2893	99.7848	94.572	71.3375	87.3824	89.6807
		95% trim	ReLU	0.01	40*40	100	50	96.3176	100	95.8792	68.2927	88.1954	83.5966
		95% trim	ReLU	0.01	40*40	100	100	94.1256	99.9681	95.9509	68.2927	87.9005	87.8768
		95% trim	ReLU	0.01	40*40	100	500	95.0502	99.9601	95.0422	66.9138	87.8527	89.1765
		95% trim	ReLU	0.01	40*40	200	50	94.6437	100	94.5082	68.2927	89.9888	89.1317
		95% trim	ReLU	0.01	40*40	200	100	94.564	99.9761	96.2538	70.5564	89.5584	89.4678
		95% trim	ReLU	0.01	40*40	200	500	95.1538	99.9362	96.1342	67.5434	88.4585	88.4706
		95% trim	ReLU	0.01	40*40	500	50	96.1741	99.9841	94.7712	68.2927	90.4113	86.0728
		95% trim	ReLU	0.01	40*40	500	100	96.2697	99.8326	95.9031	68.3804	86.6013	85.4342
		95% trim	ReLU	0.01	40*40	500	500	95.664	99.6812	94.9466	68.9383	89.7736	88.6499
		95% trim	ReLU	0.01	50*50	50	50	94.4763	99.9681	95.3531	68.2927	86.2745	90.7899
		95% trim	ReLU	0.01	50*50	50	100	95.2415	99.9761	94.4684	68.2927	87.2549	89.1317
		95% trim	ReLU	0.01	50*50	50	500	93.3046	99.9442	94.8111	69.5919	86.2267	86.3978
		95% trim	ReLU	0.01	50*50	100	50	88.323	99.9601	95.6879	68.2927	86.689	87.4062
		95% trim	ReLU	0.01	50*50	100	100	95.1618	99.9283	96.198	68.2927	89.1918	86.084
		95% trim	ReLU	0.01	50*50	100	500	95.098	99.9601	96.0306	68.7948	88.2273	87.9776
		95% trim	ReLU	0.01	50*50	200	50	95.4009	100	96.477	68.2927	89.136	86.6779
		95% trim	ReLU	0.01	50*50	200	100	94.3329	99.9681	95.8154	68.2927	88.7932	90.4202
		95% trim	ReLU	0.01	50*50	200	500	94.7394	99.9044	94.843	71.0187	88.9287	90.1961
		95% trim	ReLU	0.01	50*50	500	50	95.2495	100	96.0784	68.2927	89.7497	84.8291
		95% trim	ReLU	0.01	50*50	500	100	94.556	99.6493	96.5886	68.2927	90.8895	86.0616
		95% trim	ReLU	0.01	50*50	500	500	94.5959	99.9522	96.0386	68.213	88.9527	87.9888
		95% trim	ReLU	0.01	60*60	50	50	95.2415	99.9522	94.4365	68.2927	86.7209	91.4622
		95% trim	ReLU	0.01	60*60	50	100	94.3408	99.9841	96.1263	68.2927	88.0121	88.7731
		95% trim	ReLU	0.01	60*60	50	500	95.0821	99.9841	95.4089	69.8788	86.7607	88.0896
		95% trim	ReLU	0.01	60*60	100	50	95.106	99.9601	95.2734	68.2927	87.9643	86.465
		95% trim	ReLU	0.01	60*60	100	100	94.4126	99.9601	96.6523	68.2927	87.494	84.4818
		95% trim	ReLU	0.01	60*60	100	500	94.8031	99.8645	95.0104	68.5717	88.0839	89.1317
		95% trim	ReLU	0.01	60*60	200	50	94.7473	99.7928	95.935	68.2927	87.0477	89.1765
		95% trim	ReLU	0.01	60*60	200	100	94.4604	100	96.2618	68.2927	87.8049	87.1485
		95% trim	ReLU	0.01	60*60	200	500	92.4199	99.8246	95.1618	68.7948	88.2353	89.4118
		95% trim	ReLU	0.01	60*60	500	50	95.4647	99.992	95.2734	68.2927	87.2071	87.3725
		95% trim	ReLU	0.01	60*60	500	100	94.7553	99.9761	95.4169	68.2927	85.8521	89.1092
		95% trim	ReLU	0.01	60*60	500	500	94.8589	99.8964	95.9668	68.2927	88.8092	88.6499
		95% trim	Leaky ReLU	0.001	40*40	50	50	95.4727	100	95.114	69.018	88.0599	88.2353
		95% trim	Leaky ReLU	0.001	40*40	50	100	96.3176	99.9123	95.64	69.5919	89.1838	88.3137
		95% trim	Leaky ReLU	0.001	40*40	50	500	95.5444	99.992	93.6394	68.5637	86.944	91.1485
		95% trim	Leaky ReLU	0.001	40*40	100	50	96.2299	99.992	95.393	70.2614	88.5143	89.7255
		95% trim	Leaky ReLU	0.001	40*40	100	100	96.0545	99.992	94.7792	69.9904	89.5584	87.8768
		95% trim	Leaky ReLU	0.001	40*40	100	500	95.8553	99.992	94.1814	67.2884	87.2948	90.6106
		95% trim	Leaky ReLU	0.001	40*40	200	50	96.2538	100	95.6002	68.6115	89.4867	87.8655
		95% trim	Leaky ReLU	0.001	40*40	200	100	95.9748	99.992	95.1618	71.0187	88.9128	88.3473
		95% trim	Leaky ReLU	0.001	40*40	200	500	94.7712	99.992	95.1857	67.8702	88.5382	90.0616
		95% trim	Leaky ReLU	0.001	40*40	500	50	96.0226	99.9761	96.3335	69.1376	89.2555	89.9832
		95% trim	Leaky ReLU	0.001	40*40	500	100	95.8393	100	96.1821	69.1854	89.5425	88.4706
		95% trim	Leaky ReLU	0.001	40*40	500	500	95.2814	99.992	95.4966	70.0143	88.8012	90.2409
		95% trim	Leaky ReLU	0.001	50*50	50	50	96.2299	99.992	94.7075	68.4362	89.0722	90.3081
		95% trim	Leaky ReLU	0.001	50*50	50	100	95.6719	99.9761	95.5922	68.2289	87.5897	89.8599
		95% trim	Leaky ReLU	0.001	50*50	50	500	95.5205	99.992	94.1575	68.2528	87.0078	90.7339
		95% trim	Leaky ReLU	0.001	50*50	100	50	95.4727	99.992	96.3893	71.744	89.7418	89.3557
		95% trim	Leaky ReLU	0.001	50*50	100	100	95.911	99.9761	93.9024	68.4441	88.0679	91.5742
		95% trim	Leaky ReLU	0.001	50*50	100	500	94.6836	100	94.4126	68.5238	87.8846	90.465
		95% trim	Leaky ReLU	0.001	50*50	200	50	95.9908	99.9681	95.8632	71.3534	89.1838	89.2661
		95% trim	Leaky ReLU	0.001	50*50	200	100	96.4849	99.992	93.3286	69.2013	88.6019	88.5602
		95% trim	Leaky ReLU	0.001	50*50	200	500	95.1538	99.9522	93.6633	68.4202	88.5621	91.1597
		95% trim	Leaky ReLU	0.001	50*50	500	50	95.3212	99.8884	96.1422	70.0143	89.8773	91.1261
		95% trim	Leaky ReLU	0.001	50*50	500	100	95.8871	99.9203	95.7755	72.3019	89.0642	91.4958
		95% trim	Leaky ReLU	0.001	50*50	500	500	94.7712	99.9362	94.827	67.6231	89.3512	89.2437
		95% trim	Leaky ReLU	0.001	60*60	50	50	95.6002	99.992	95.6002	68.4521	89.8294	88.5714
		95% trim	Leaky ReLU	0.001	60*60	50	100	95.648	100	95.5045	68.5318	87.0556	87.4398
		95% trim	Leaky ReLU	0.001	60*60	50	500	94.5002	99.992	92.9699	66.7942	88.315	90.1401
		95% trim	Leaky ReLU	0.001	60*60	100	50	95.5763	99.8964	95.664	66.85	88.3947	89.5126
		95% trim	Leaky ReLU	0.001	60*60	100	100	95.5045	99.992	94.03	68.9941	87.5817	89.1989
		95% trim	Leaky ReLU	0.001	60*60	100	500	95.098	100	94.2372	69.1376	88.4744	90.8683
		95% trim	Leaky ReLU	0.001	60*60	200	50	95.8951	99.9761	96.3494	69.8071	88.9606	88.3361
		95% trim	Leaky ReLU	0.001	60*60	200	100	95.1379	99.9761	95.8951	69.1934	88.2433	88.7955
		95% trim	Leaky ReLU	0.001	60*60	200	500	94.9386	99.9681	94.8509	68.6912	88.4824	89.7591
		95% trim	Leaky ReLU	0.001	60*60	500	50	95.0024	99.9044	96.0067	69.4803	90.2838	90.4986
		95% trim	Leaky ReLU	0.001	60*60	500	100	95.6719	99.8326	95.6719	69.4006	89.1997	87.0252
		95% trim	Leaky ReLU	0.001	60*60	500	500	94.5799	99.9841	95.664	67.4717	88.8809	90.8011
		95% trim	Leaky ReLU	0.0001	40*40	50	50	94.4205	100	93.3445	67.0014	84.2021	90.8571
		95% trim	Leaky ReLU	0.0001	40*40	50	100	93.4481	99.992	92.9938	67.1848	84.0507	91.2381
		95% trim	Leaky ReLU	0.0001	40*40	50	500	90.8816	99.9283	90.491	68.0615	79.2842	87.2157
		95% trim	Leaky ReLU	0.0001	40*40	100	50	94.8828	99.992	93.9821	67.5355	85.9158	91.1261
		95% trim	Leaky ReLU	0.0001	40*40	100	100	93.488	99.992	93.2807	67.3601	85.4296	90.4874
		95% trim	Leaky ReLU	0.0001	40*40	100	500	91.9257	99.992	91.3678	67.7029	81.5718	88.6499
		95% trim	Leaky ReLU	0.0001	40*40	200	50	95.935	99.992	93.8307	67.3681	87.0636	90.5546
		95% trim	Leaky ReLU	0.0001	40*40	200	100	94.7553	99.992	94.03	67.2963	85.9955	91.8207
		95% trim	Leaky ReLU	0.0001	40*40	200	500	92.8423	99.992	92.388	67.4319	82.8471	90.1625
		95% trim	Leaky ReLU	0.0001	40*40	500	50	95.8632	99.992	95.1618	68.5159	88.5541	89.3557
		95% trim	Leaky ReLU	0.0001	40*40	500	100	95.7755	99.992	94.2213	67.7188	87.5418	91.4062
		95% trim	Leaky ReLU	0.0001	40*40	500	500	93.9423	99.992	93.4561	67.1051	85.055	91.1709
		95% trim	Leaky ReLU	0.0001	50*50	50	50	92.4279	99.992	93.0655	68.1652	84.3695	90.8796
		95% trim	Leaky ReLU	0.0001	50*50	50	100	93.48	100	92.9141	67.1608	84.7601	91.6415
		95% trim	Leaky ReLU	0.0001	50*50	50	500	91.6707	99.992	90.4751	67.8623	80.7429	88.5602
		95% trim	Leaky ReLU	0.0001	50*50	100	50	93.7908	99.992	93.6314	67.1369	86.6252	91.0252
		95% trim	Leaky ReLU	0.0001	50*50	100	100	93.9582	99.992	93.6633	67.392	84.792	90.4762
		95% trim	Leaky ReLU	0.0001	50*50	100	500	92.6829	99.992	91.7822	67.2963	82.2095	90.8235
		95% trim	Leaky ReLU	0.0001	50*50	200	50	95.2575	99.992	93.7271	67.3282	87.5897	90.8011
		95% trim	Leaky ReLU	0.0001	50*50	200	100	95.5922	99.992	93.5358	67.2645	86.1071	91.2157
		95% trim	Leaky ReLU	0.0001	50*50	200	500	93.6394	99.992	92.6431	67.1449	83.9311	90.9356
		95% trim	Leaky ReLU	0.0001	50*50	500	50	95.7516	99.992	93.743	68.1412	88.2592	90.9132
		95% trim	Leaky ReLU	0.0001	50*50	500	100	95.919	99.992	94.7952	67.8144	88.7056	91.395
		95% trim	Leaky ReLU	0.0001	50*50	500	500	94.564	99.992	93.7032	66.9058	85.3977	91.8992
		95% trim	Leaky ReLU	0.0001	60*60	50	50	94.0459	99.992	93.5358	66.4435	86.1789	89.5686
		95% trim	Leaky ReLU	0.0001	60*60	50	100	93.743	99.992	93.2967	66.4435	85.5731	91.07
		95% trim	Leaky ReLU	0.0001	60*60	50	500	91.9018	99.992	91.0649	67.129	81.8189	89.4678
		95% trim	Leaky ReLU	0.0001	60*60	100	50	94.301	99.992	94.022	67.2087	86.681	89.9384
		95% trim	Leaky ReLU	0.0001	60*60	100	100	94.1017	99.992	93.1691	66.4435	86.5854	90.6779
		95% trim	Leaky ReLU	0.0001	60*60	100	500	92.6989	99.992	91.6069	67.0732	83.7	90.8123
		95% trim	Leaky ReLU	0.0001	60*60	200	50	95.6241	99.992	94.6357	67.3442	87.8447	90.084
		95% trim	Leaky ReLU	0.0001	60*60	200	100	94.2691	99.992	93.8466	66.9696	87.1911	90.3417
		95% trim	Leaky ReLU	0.0001	60*60	200	500	93.4401	99.992	92.4916	66.4833	85.6927	90.6555
		95% trim	Leaky ReLU	0.0001	60*60	500	50	95.1538	99.992	95.4487	68.2927	88.0041	89.0644
		95% trim	Leaky ReLU	0.0001	60*60	500	100	95.7995	99.992	93.8387	67.0413	87.6534	89.479
		95% trim	Leaky ReLU	0.0001	60*60	500	500	94.3966	99.992	93.2728	67.0174	86.4578	91.8319
		95% trim	Leaky ReLU	0.01	40*40	50	50	94.6836	100	95.4806	69.3608	89.4229	89.6246
		95% trim	Leaky ReLU	0.01	40*40	50	100	95.6082	99.992	95.7038	69.0021	88.3309	88.4258
		95% trim	Leaky ReLU	0.01	40*40	50	500	95.6002	99.9601	94.4126	68.1492	88.1396	88.6947
		95% trim	Leaky ReLU	0.01	40*40	100	50	95.8553	99.992	96.0067	69.4963	87.8766	81.1653
		95% trim	Leaky ReLU	0.01	40*40	100	100	93.488	99.9841	94.3408	69.7832	88.4664	89.0868
		95% trim	Leaky ReLU	0.01	40*40	100	500	93.6474	99.992	95.7676	69.7194	87.5179	89.5686
		95% trim	Leaky ReLU	0.01	40*40	200	50	94.1575	99.8725	95.6879	68.6035	88.6498	84.9188
		95% trim	Leaky ReLU	0.01	40*40	200	100	94.8509	99.8884	95.393	68.8028	86.4658	89.1204
		95% trim	Leaky ReLU	0.01	40*40	200	500	95.664	99.7131	95.9748	69.9984	88.6657	90.577
		95% trim	Leaky ReLU	0.01	40*40	500	50	94.9546	99.9841	96.74	68.1731	89.3113	84.6499
		95% trim	Leaky ReLU	0.01	40*40	500	100	93.0416	99.9123	96.3574	69.5202	88.6259	89.8824
		95% trim	Leaky ReLU	0.01	40*40	500	500	95.6799	99.8406	96.2378	70.373	89.3831	88.4258
		95% trim	Leaky ReLU	0.01	50*50	50	50	95.664	100	96.3654	68.3007	87.0875	88.3922
		95% trim	Leaky ReLU	0.01	50*50	50	100	94.9227	100	95.5285	67.655	88.5382	89.7367
		95% trim	Leaky ReLU	0.01	50*50	50	500	94.8669	99.8486	95.5444	68.4521	83.8036	85.4118
		95% trim	Leaky ReLU	0.01	50*50	100	50	95.0901	99.9362	94.4843	68.6434	87.9165	87.4846
		95% trim	Leaky ReLU	0.01	50*50	100	100	94.1097	99.9601	95.8871	67.8543	88.5382	89.1204
		95% trim	Leaky ReLU	0.01	50*50	100	500	94.9307	99.9283	95.8154	70.66	88.6657	89.1429
		95% trim	Leaky ReLU	0.01	50*50	200	50	94.5959	99.9761	96.1502	68.8985	85.8999	89.0868
		95% trim	Leaky ReLU	0.01	50*50	200	100	95.5205	100	96.0465	70.0861	87.4223	87.6863
		95% trim	Leaky ReLU	0.01	50*50	200	500	95.3372	99.9123	95.9509	69.0897	87.5179	90.6779
		95% trim	Leaky ReLU	0.01	50*50	500	50	95.919	99.7689	96.4132	66.5471	88.9048	90.4762
		95% trim	Leaky ReLU	0.01	50*50	500	100	95.5444	99.992	96.2538	68.1333	88.7135	88.3025
		95% trim	Leaky ReLU	0.01	50*50	500	500	95.3292	99.8246	95.8473	70.3571	90.1403	90.4986
		95% trim	Leaky ReLU	0.01	60*60	50	50	95.4089	99.9601	95.0502	66.7304	87.0317	84.3473
		95% trim	Leaky ReLU	0.01	60*60	50	100	95.2176	99.8884	95.4487	68.4521	88.7614	90.8235
		95% trim	Leaky ReLU	0.01	60*60	50	500	93.5198	99.8246	94.3408	69.7035	86.9839	90.3081
		95% trim	Leaky ReLU	0.01	60*60	100	50	94.5242	99.9522	96.0944	68.0615	87.6614	87.7087
		95% trim	Leaky ReLU	0.01	60*60	100	100	93.7669	99.9761	96.1821	67.4079	85.8042	88.0784
		95% trim	Leaky ReLU	0.01	60*60	100	500	93.7271	99.9123	96.0465	69.7194	87.5339	90.084
		95% trim	Leaky ReLU	0.01	60*60	200	50	96.2857	99.992	95.0582	67.2804	88.7853	84.5938
		95% trim	Leaky ReLU	0.01	60*60	200	100	95.3611	100	96.8516	67.2884	86.7288	86.6443
		95% trim	Leaky ReLU	0.01	60*60	200	500	95.656	99.9841	95.2654	68.6035	87.773	88.2689
		95% trim	Leaky ReLU	0.01	60*60	500	50	93.2568	99.9761	95.2176	66.5391	88.044	82.7563
		95% trim	Leaky ReLU	0.01	60*60	500	100	95.5125	99.8804	96.6045	62.2669	88.8729	86.6667
		95% trim	Leaky ReLU	0.01	60*60	500	500	95.6879	99.9601	96.2458	70.0701	88.6896	88.3697
		90% trim	ReLU	0.001	40*40	50	50	92.8503	99.9123	93.9662	69.281	89.0642	87.944
		90% trim	ReLU	0.001	40*40	50	100	93.5756	99.8964	92.8742	69.4564	88.9686	89.7367
		90% trim	ReLU	0.001	40*40	50	500	92.7865	99.7928	92.2206	69.8868	87.0716	89.9832
		90% trim	ReLU	0.001	40*40	100	50	95.5842	99.9203	94.3647	70.1339	88.8889	90.0616
		90% trim	ReLU	0.001	40*40	100	100	96.3176	99.8964	94.7872	68.6275	89.3751	88.4818
		90% trim	ReLU	0.001	40*40	100	500	94.1974	99.8087	92.9938	69.6875	87.7969	88.4146
		90% trim	ReLU	0.001	40*40	200	50	95.5922	99.9203	94.7792	69.0021	87.8049	88.7843
		90% trim	ReLU	0.001	40*40	200	100	93.7829	99.9283	94.022	70.1498	89.8454	90.3305
		90% trim	ReLU	0.001	40*40	200	500	94.6357	99.7848	94.0379	69.4165	88.8331	89.9496
		90% trim	ReLU	0.001	40*40	500	50	96.0625	99.8246	95.1618	70.4129	90.4193	88.5266
		90% trim	ReLU	0.001	40*40	500	100	92.5713	99.9283	95.0821	70.644	90.7461	87.7759
		90% trim	ReLU	0.001	40*40	500	500	95.9748	99.8326	95.2176	71.1302	89.9091	90.028
		90% trim	ReLU	0.001	50*50	50	50	94.5162	99.9283	93.6713	69.4963	88.1556	90.521
		90% trim	ReLU	0.001	50*50	50	100	93.9582	99.8964	93.1612	68.7709	88.5621	86.4426
		90% trim	ReLU	0.001	50*50	50	500	93.8785	99.7768	91.9656	68.468	86.968	88.2913
		90% trim	ReLU	0.001	50*50	100	50	95.369	99.8884	94.2372	68.6753	87.7969	88.7283
		90% trim	ReLU	0.001	50*50	100	100	93.9024	99.9044	93.6394	68.6434	88.2751	90.4202
		90% trim	ReLU	0.001	50*50	100	500	93.2409	99.8645	93.5039	68.2767	88.586	87.8207
		90% trim	ReLU	0.001	50*50	200	50	96.8197	99.8486	94.285	68.0297	89.7497	89.5014
		90% trim	ReLU	0.001	50*50	200	100	95.2893	99.9044	93.2887	69.3926	89.2555	87.9552
		90% trim	ReLU	0.001	50*50	200	500	94.4126	99.8246	94.7792	68.8028	88.4186	89.591
		90% trim	ReLU	0.001	50*50	500	50	94.7075	99.8167	94.8589	71.1382	87.3266	87.7535
		90% trim	ReLU	0.001	50*50	500	100	96.1661	99.8246	93.8706	69.8948	90.1164	90.3305
		90% trim	ReLU	0.001	50*50	500	500	95.5125	99.8087	94.5242	68.3485	88.7773	90.2409
		90% trim	ReLU	0.001	60*60	50	50	95.3132	99.9203	95.5524	69.018	88.3788	87.9104
		90% trim	ReLU	0.001	60*60	50	100	95.7915	99.9044	94.4923	67.4717	88.7693	89.1092
		90% trim	ReLU	0.001	60*60	50	500	93.209	99.8167	93.0257	68.8267	87.3585	89.2885
		90% trim	ReLU	0.001	60*60	100	50	96.1023	99.8804	94.4365	68.8028	88.2592	86.7115
		90% trim	ReLU	0.001	60*60	100	100	94.9307	99.8964	94.8509	68.9702	88.5302	88.6162
		90% trim	ReLU	0.001	60*60	100	500	93.2409	99.8326	93.7271	68.8825	86.7527	86.6331
		90% trim	ReLU	0.001	60*60	200	50	95.5285	99.9283	94.8908	66.6428	88.9686	87.395
		90% trim	ReLU	0.001	60*60	200	100	96.2219	99.8246	94.835	69.3209	89.5983	87.3501
		90% trim	ReLU	0.001	60*60	200	500	93.3923	99.8645	93.9503	70.1259	88.5302	91.1373
		90% trim	ReLU	0.001	60*60	500	50	96.2538	99.8964	95.3372	71.8157	90.0207	87.1261
		90% trim	ReLU	0.001	60*60	500	100	95.4727	99.7848	94.6357	71.1621	89.12	87.2381
		90% trim	ReLU	0.001	60*60	500	500	94.6756	99.8167	95.0502	68.6514	88.9208	91.395
		90% trim	ReLU	0.0001	40*40	50	50	92.8344	99.8565	92.7786	67.5355	85.5093	88.112
		90% trim	ReLU	0.0001	40*40	50	100	92.8583	99.8246	92.4279	67.942	82.8312	85.1204
		90% trim	ReLU	0.0001	40*40	50	500	89.8852	99.5616	90.2678	68.0057	78.7263	79.451
		90% trim	ReLU	0.0001	40*40	100	50	93.5358	99.9044	92.8264	67.2406	86.1231	87.8319
		90% trim	ReLU	0.0001	40*40	100	100	93.8466	99.8565	93.2568	67.7108	84.9673	86.7675
		90% trim	ReLU	0.0001	40*40	100	500	91.304	99.6971	91.2323	67.8941	81.0139	82.4202
		90% trim	ReLU	0.0001	40*40	200	50	95.5444	99.8884	93.6872	68.2369	87.494	89.2437
		90% trim	ReLU	0.0001	40*40	200	100	95.1299	99.8645	92.9061	67.8702	86.418	88.5154
		90% trim	ReLU	0.0001	40*40	200	500	92.5474	99.729	92.3003	67.7746	82.6797	84.4258
		90% trim	ReLU	0.0001	40*40	500	50	96.1342	99.8884	94.827	69.6796	88.6817	88.3585
		90% trim	ReLU	0.0001	40*40	500	100	95.656	99.8804	93.6474	69.6557	88.0998	89.8151
		90% trim	ReLU	0.0001	40*40	500	500	94.2213	99.737	92.7706	67.4239	84.234	86.8796
		90% trim	ReLU	0.0001	50*50	50	50	93.5278	99.8884	91.7902	68.0137	85.4137	86.958
		90% trim	ReLU	0.0001	50*50	50	100	92.0931	99.8645	92.0134	68.8108	83.1819	85.7703
		90% trim	ReLU	0.0001	50*50	50	500	90.3874	99.6493	90.3794	68.0934	79.7386	82.0168
		90% trim	ReLU	0.0001	50*50	100	50	94.564	99.8884	93.1771	68.6673	85.6209	87.7423
		90% trim	ReLU	0.0001	50*50	100	100	93.9503	99.8804	92.7308	68.8427	85.1666	87.9776
		90% trim	ReLU	0.0001	50*50	100	500	91.6786	99.6971	91.033	68.0057	81.1175	83.5406
		90% trim	ReLU	0.0001	50*50	200	50	95.8074	99.8964	94.0698	69.5919	88.2672	89.3782
		90% trim	ReLU	0.0001	50*50	200	100	94.301	99.8804	92.4677	68.2927	86.2267	89.1541
		90% trim	ReLU	0.0001	50*50	200	500	92.5713	99.729	92.0214	67.5355	82.5602	85.2101
		90% trim	ReLU	0.0001	50*50	500	50	96.2139	99.8964	93.1293	70.3332	89.3113	88.8067
		90% trim	ReLU	0.0001	50*50	500	100	96.0067	99.8725	93.3445	68.2608	87.8208	91.1148
		90% trim	ReLU	0.0001	50*50	500	500	94.2372	99.729	92.8423	67.7108	84.2978	87.4062
		90% trim	ReLU	0.0001	60*60	50	50	92.8105	99.9044	93.0894	67.8941	85.9796	86.7115
		90% trim	ReLU	0.0001	60*60	50	100	92.0692	99.8804	92.1967	68.2369	84.7441	86.7339
		90% trim	ReLU	0.0001	60*60	50	500	90.7779	99.6652	91.0888	68.2927	80.5197	83.2157
		90% trim	ReLU	0.0001	60*60	100	50	94.7473	99.8884	93.2887	68.2209	86.0673	87.1821
		90% trim	ReLU	0.0001	60*60	100	100	93.5358	99.8725	93.1851	68.755	85.8282	87.6863
		90% trim	ReLU	0.0001	60*60	100	500	91.3359	99.729	91.4236	67.3043	81.516	85.1204
		90% trim	ReLU	0.0001	60*60	200	50	95.0024	99.8884	92.8184	69.4405	88.4664	88.7171
		90% trim	ReLU	0.0001	60*60	200	100	94.2053	99.8725	93.2648	68.2209	87.0636	88.2353
		90% trim	ReLU	0.0001	60*60	200	500	91.8779	99.7449	92.4518	67.3521	83.3971	86.1737
		90% trim	ReLU	0.0001	60*60	500	50	96.1581	99.8884	95.1459	70.381	88.7773	88.8852
		90% trim	ReLU	0.0001	60*60	500	100	95.5285	99.8725	93.8387	70.0303	88.3309	88.4594
		90% trim	ReLU	0.0001	60*60	500	500	93.8785	99.729	93.3286	68.9861	85.7166	89.1653
		90% trim	ReLU	0.01	40*40	50	50	94.9386	99.9123	96.2378	68.2927	89.2954	85.8487
		90% trim	ReLU	0.01	40*40	50	100	95.4886	99.9841	95.369	68.2927	88.2592	85.916
		90% trim	ReLU	0.01	40*40	50	500	91.4953	99.6174	93.9821	69.6238	89.6062	88.9412
		90% trim	ReLU	0.01	40*40	100	50	93.1532	99.7928	95.0024	68.2927	88.2034	85.591
		90% trim	ReLU	0.01	40*40	100	100	95.7118	99.9283	95.1698	68.2927	87.3187	83.8431
		90% trim	ReLU	0.01	40*40	100	500	95.9668	99.6413	90.7461	69.4723	89.3592	88.9524
		90% trim	ReLU	0.01	40*40	200	50	94.9705	99.8884	95.385	68.2927	87.4063	83.2157
		90% trim	ReLU	0.01	40*40	200	100	95.2893	99.7449	96.1502	68.2927	89.0642	86.8908
		90% trim	ReLU	0.01	40*40	200	500	95.106	99.8087	95.098	72.8519	89.399	89.9048
		90% trim	ReLU	0.01	40*40	500	50	94.9386	99.7051	94.1336	68.2927	87.1194	85.8824
		90% trim	ReLU	0.01	40*40	500	100	93.5756	99.8565	95.6321	68.2927	81.6675	89.1204
		90% trim	ReLU	0.01	40*40	500	500	96.2458	99.8087	94.7154	71.6722	89.8852	89.5574
		90% trim	ReLU	0.01	50*50	50	50	92.5076	99.8167	93.6075	68.2927	86.4738	82.4314
		90% trim	ReLU	0.01	50*50	50	100	94.5959	99.7609	95.0263	68.2927	85.5332	87.2269
		90% trim	ReLU	0.01	50*50	50	500	94.7792	99.8167	92.7706	71.0904	87.9005	85.2549
		90% trim	ReLU	0.01	50*50	100	50	95.8712	99.8565	95.2415	68.2927	86.418	87.944
		90% trim	ReLU	0.01	50*50	100	100	93.1851	99.9123	93.3604	68.2927	87.8288	85.4566
		90% trim	ReLU	0.01	50*50	100	500	94.7792	99.8486	94.4046	68.2927	89.3512	90.7787
		90% trim	ReLU	0.01	50*50	200	50	94.3966	99.7609	94.9386	68.2927	84.3934	85.0084
		90% trim	ReLU	0.01	50*50	200	100	95.0901	99.8167	94.4046	68.2927	86.41	85.8936
		90% trim	ReLU	0.01	50*50	200	500	96.1581	99.6971	94.0379	68.9622	89.9012	87.0924
		90% trim	ReLU	0.01	50*50	500	50	94.7712	99.7449	92.7865	68.2927	84.234	82.2745
		90% trim	ReLU	0.01	50*50	500	100	94.8589	99.8087	94.2213	68.2927	87.6614	85.7703
		90% trim	ReLU	0.01	50*50	500	500	96.2219	99.7131	94.293	70.3969	89.8454	85.8375
		90% trim	ReLU	0.01	60*60	50	50	94.0619	99.8406	94.564	68.2927	87.5179	85.6022
		90% trim	ReLU	0.01	60*60	50	100	94.4684	99.8406	95.5364	68.2927	87.4303	88.3697
		90% trim	ReLU	0.01	60*60	50	500	93.6553	99.8007	94.827	72.007	87.8607	87.8431
		90% trim	ReLU	0.01	60*60	100	50	92.8184	99.7529	94.7154	68.2927	84.8876	85.2773
		90% trim	ReLU	0.01	60*60	100	100	94.5242	99.737	94.827	68.2927	88.5541	88.4594
		90% trim	ReLU	0.01	60*60	100	500	94.6118	99.7928	94.3488	70.11	88.857	86.6331
		90% trim	ReLU	0.01	60*60	200	50	94.7792	99.8326	94.9625	68.2927	85.063	86.6106
		90% trim	ReLU	0.01	60*60	200	100	93.209	99.6015	94.7154	68.2927	87.1752	82.0616
		90% trim	ReLU	0.01	60*60	200	500	94.6915	99.729	94.9227	70.3013	87.9802	91.563
		90% trim	ReLU	0.01	60*60	500	50	94.7553	99.8565	94.6278	68.2927	85.9397	83.6751
		90% trim	ReLU	0.01	60*60	500	100	93.4481	99.5935	95.7038	68.2927	87.1752	83.8207
		90% trim	ReLU	0.01	60*60	500	500	95.2096	99.737	95.0422	68.2927	89.0563	88.5378
		90% trim	Leaky ReLU	0.001	40*40	50	50	96.1103	99.8087	95.0662	70.9629	88.0839	86.4538
		90% trim	Leaky ReLU	0.001	40*40	50	100	96.9074	99.8565	94.5959	70.2455	89.8693	89.2661
		90% trim	Leaky ReLU	0.001	40*40	50	500	95.0183	99.8007	93.209	70.7875	88.4824	88.8067
		90% trim	Leaky ReLU	0.001	40*40	100	50	96.4929	99.9123	94.8828	71.2657	89.7975	88.9972
		90% trim	Leaky ReLU	0.001	40*40	100	100	96.206	99.8246	94.9386	70.3252	90.1323	89.3894
		90% trim	Leaky ReLU	0.001	40*40	100	500	95.7995	99.7848	94.2531	69.2571	88.2273	90.0392
		90% trim	Leaky ReLU	0.001	40*40	200	50	95.8234	99.8486	95.7038	69.7752	90.2917	88.5602
		90% trim	Leaky ReLU	0.001	40*40	200	100	95.9828	99.8725	95.0662	71.3933	90.3635	88.5378
		90% trim	Leaky ReLU	0.001	40*40	200	500	96.1422	99.737	93.8546	70.9071	88.5382	89.423
		90% trim	Leaky ReLU	0.001	40*40	500	50	96.7001	99.8167	94.8988	70.2853	90.6424	89.1204
		90% trim	Leaky ReLU	0.001	40*40	500	100	96.7161	99.8326	94.9466	71.4491	90.9533	90.1064
		90% trim	Leaky ReLU	0.001	40*40	500	500	96.0226	99.8406	94.4365	71.0266	89.3831	89.8936
		90% trim	Leaky ReLU	0.001	50*50	50	50	96.5965	99.9203	93.9423	69.1934	89.6142	87.7311
		90% trim	Leaky ReLU	0.001	50*50	50	100	96.2219	99.7928	93.8865	71.1462	88.9845	87.8543
		90% trim	Leaky ReLU	0.001	50*50	50	500	94.4923	99.7529	93.5517	69.2731	87.5976	89.2885
		90% trim	Leaky ReLU	0.001	50*50	100	50	96.1502	99.9123	94.6836	70.4368	90.1801	87.7311
		90% trim	Leaky ReLU	0.001	50*50	100	100	95.7835	99.8326	93.9662	70.1498	88.4744	88.4482
		90% trim	Leaky ReLU	0.001	50*50	100	500	94.827	99.7131	92.5315	70.2694	87.5737	88.9636
		90% trim	Leaky ReLU	0.001	50*50	200	50	96.3016	99.8565	94.4763	71.2897	89.0084	89.2661
		90% trim	Leaky ReLU	0.001	50*50	200	100	94.3568	99.7768	95.1538	68.6832	90.1722	85.7143
		90% trim	Leaky ReLU	0.001	50*50	200	500	95.2814	99.729	93.5996	68.4999	89.2077	90.0952
		90% trim	Leaky ReLU	0.001	50*50	500	50	96.3415	99.8725	94.0061	72.2222	89.415	90.084
		90% trim	Leaky ReLU	0.001	50*50	500	100	96.8436	99.737	94.3647	69.9187	90.77	89.2549
		90% trim	Leaky ReLU	0.001	50*50	500	500	95.369	99.8167	93.6793	69.3448	89.4947	89.3557
		90% trim	Leaky ReLU	0.001	60*60	50	50	96.3255	99.8486	94.2531	70.2535	86.9361	87.5294
		90% trim	Leaky ReLU	0.001	60*60	50	100	96.206	99.8884	94.3329	68.7231	88.2831	88.4146
		90% trim	Leaky ReLU	0.001	60*60	50	500	94.3807	99.7768	94.2611	70.2056	88.1715	87.0924
		90% trim	Leaky ReLU	0.001	60*60	100	50	95.6879	99.8645	94.9067	69.6238	90.7461	87.1597
		90% trim	Leaky ReLU	0.001	60*60	100	100	95.911	99.7689	95.0263	70.2296	89.2157	89.3894
		90% trim	Leaky ReLU	0.001	60*60	100	500	95.7198	99.7609	94.2372	69.3926	88.5701	88.4258
		90% trim	Leaky ReLU	0.001	60*60	200	50	95.9031	99.9761	93.5119	70.7158	90.2359	88.437
		90% trim	Leaky ReLU	0.001	60*60	200	100	95.2017	99.7848	94.7473	71.5766	89.7497	88.986
		90% trim	Leaky ReLU	0.001	60*60	200	500	93.4561	99.6971	94.3807	70.8114	89.2795	88.9076
		90% trim	Leaky ReLU	0.001	60*60	500	50	96.2139	99.8725	95.0263	70.8672	89.9649	88.7955
		90% trim	Leaky ReLU	0.001	60*60	500	100	96.5487	99.8246	94.3727	69.2571	90.3714	89.7143
		90% trim	Leaky ReLU	0.001	60*60	500	500	95.3451	99.8087	94.9227	70.373	89.5265	89.5574
		90% trim	Leaky ReLU	0.0001	40*40	50	50	93.472	99.9123	93.0735	67.2485	84.7601	86.3641
		90% trim	Leaky ReLU	0.0001	40*40	50	100	92.6909	99.8007	92.2685	67.4	83.6681	85.6583
		90% trim	Leaky ReLU	0.0001	40*40	50	500	90.3156	99.6333	90.0207	68.0456	79.4277	78.9804
		90% trim	Leaky ReLU	0.0001	40*40	100	50	93.3206	99.8645	92.8423	69.1216	87.223	88.6499
		90% trim	Leaky ReLU	0.0001	40*40	100	100	93.3525	99.8406	93.1054	67.934	84.9833	87.1261
		90% trim	Leaky ReLU	0.0001	40*40	100	500	91.575	99.6971	91.4953	67.5992	82.0341	82.0952
		90% trim	Leaky ReLU	0.0001	40*40	200	50	95.8313	99.8884	93.8626	69.018	87.6375	88.4706
		90% trim	Leaky ReLU	0.0001	40*40	200	100	95.1538	99.8565	93.488	68.2209	87.0795	88.1905
		90% trim	Leaky ReLU	0.0001	40*40	200	500	92.6829	99.7131	91.8938	67.7029	82.9029	85.2325
		90% trim	Leaky ReLU	0.0001	40*40	500	50	95.9828	99.8725	94.1655	69.6557	89.1519	89.1092
		90% trim	Leaky ReLU	0.0001	40*40	500	100	96.0705	99.8804	93.4641	67.8543	88.2273	89.1317
		90% trim	Leaky ReLU	0.0001	40*40	500	500	94.4205	99.7131	93.0655	68.0376	84.6565	86.5434
		90% trim	Leaky ReLU	0.0001	50*50	50	50	94.4763	99.9203	92.3721	68.9702	87.0716	86.5434
		90% trim	Leaky ReLU	0.0001	50*50	50	100	92.109	99.8645	92.5474	68.7151	84.0108	85.9832
		90% trim	Leaky ReLU	0.0001	50*50	50	500	90.9055	99.7131	90.6982	67.9101	80.448	82.7899
		90% trim	Leaky ReLU	0.0001	50*50	100	50	94.5242	99.8804	93.0974	68.4919	87.3904	88.4146
		90% trim	Leaky ReLU	0.0001	50*50	100	100	93.2568	99.8884	92.9858	67.8623	86.1071	86.4986
		90% trim	Leaky ReLU	0.0001	50*50	100	500	92.5634	99.6971	91.3199	67.6391	82.3848	84.986
		90% trim	Leaky ReLU	0.0001	50*50	200	50	95.5444	99.8645	93.5597	68.476	88.586	88.1008
		90% trim	Leaky ReLU	0.0001	50*50	200	100	95.3212	99.8645	93.1691	69.3289	87.4621	88.3137
		90% trim	Leaky ReLU	0.0001	50*50	200	500	93.2887	99.729	92.5076	67.5753	83.6043	85.7479
		90% trim	Leaky ReLU	0.0001	50*50	500	50	96.477	99.8804	92.4837	69.9187	88.9606	88.381
		90% trim	Leaky ReLU	0.0001	50*50	500	100	95.8074	99.8645	93.0815	70.5564	88.3788	88.8179
		90% trim	Leaky ReLU	0.0001	50*50	500	500	94.5082	99.721	92.8822	68.2927	85.6767	88.0784
		90% trim	Leaky ReLU	0.0001	60*60	50	50	92.396	99.8246	93.2568	68.3644	86.7448	88.2913
		90% trim	Leaky ReLU	0.0001	60*60	50	100	92.8503	99.8406	92.93	67.6869	85.2543	87.1597
		90% trim	Leaky ReLU	0.0001	60*60	50	500	91.4634	99.737	91.2801	67.655	82.2254	83.3165
		90% trim	Leaky ReLU	0.0001	60*60	100	50	94.293	99.8964	93.6952	69.3926	87.7252	89.3333
		90% trim	Leaky ReLU	0.0001	60*60	100	100	94.2611	99.8884	93.0097	69.7433	87.231	87.9552
		90% trim	Leaky ReLU	0.0001	60*60	100	500	91.9337	99.7449	92.3402	67.5753	83.684	85.7143
		90% trim	Leaky ReLU	0.0001	60*60	200	50	95.7596	99.8326	94.3966	69.56	88.594	88.6835
		90% trim	Leaky ReLU	0.0001	60*60	200	100	94.8589	99.8804	93.0336	69.3608	88.0839	87.944
		90% trim	Leaky ReLU	0.0001	60*60	200	500	92.4358	99.721	92.5155	67.5992	84.3855	87.0588
		90% trim	Leaky ReLU	0.0001	60*60	500	50	96.3893	99.8645	93.8307	71.2179	90.4272	88.2353
		90% trim	Leaky ReLU	0.0001	60*60	500	100	95.7755	99.8645	94.022	69.4245	88.4983	90.2185
		90% trim	Leaky ReLU	0.0001	60*60	500	500	94.3727	99.7449	92.9699	67.1449	86.4977	87.9328
		90% trim	Leaky ReLU	0.01	40*40	50	50	92.4518	99.8804	94.4524	68.3086	87.8049	85.972
		90% trim	Leaky ReLU	0.01	40*40	50	100	96.4132	99.9601	95.7118	70.4288	89.2874	86.5994
		90% trim	Leaky ReLU	0.01	40*40	50	500	93.5278	99.992	94.4763	69.8709	89.0483	87.8768
		90% trim	Leaky ReLU	0.01	40*40	100	50	94.7952	99.729	95.9908	71.2099	87.502	83.8319
		90% trim	Leaky ReLU	0.01	40*40	100	100	94.014	99.8964	94.4046	71.2259	90.3555	87.2829
		90% trim	Leaky ReLU	0.01	40*40	100	500	94.8749	99.7131	95.6879	72.1505	89.3592	88.8179
		90% trim	Leaky ReLU	0.01	40*40	200	50	94.3169	99.5935	95.656	68.2608	84.2101	86.7787
		90% trim	Leaky ReLU	0.01	40*40	200	100	95.1299	99.8884	95.0183	70.6042	88.5462	86.5658
		90% trim	Leaky ReLU	0.01	40*40	200	500	95.8154	99.7928	95.656	69.831	89.4707	88.8515
		90% trim	Leaky ReLU	0.01	40*40	500	50	95.0821	99.8167	95.122	70.1339	89.7178	88.1905
		90% trim	Leaky ReLU	0.01	40*40	500	100	95.7755	99.5696	96.3016	68.8745	87.9882	84.1681
		90% trim	Leaky ReLU	0.01	40*40	500	500	95.7357	99.6812	95.6082	71.5049	90.0845	87.395
		90% trim	Leaky ReLU	0.01	50*50	50	50	95.3292	99.7529	92.8423	68.4282	83.0225	84.9188
		90% trim	Leaky ReLU	0.01	50*50	50	100	94.3966	99.7689	94.4046	68.3963	87.5498	84.3697
		90% trim	Leaky ReLU	0.01	50*50	50	500	95.7596	99.8246	93.6633	70.5324	87.3187	89.4006
		90% trim	Leaky ReLU	0.01	50*50	100	50	93.5836	99.8884	94.8828	68.5398	86.6013	86.7899
		90% trim	Leaky ReLU	0.01	50*50	100	100	94.0937	99.8246	95.1379	69.3448	88.6259	88.3922
		90% trim	Leaky ReLU	0.01	50*50	100	500	95.7596	99.7848	92.9938	70.5165	88.8411	89.9944
		90% trim	Leaky ReLU	0.01	50*50	200	50	94.1416	99.6333	94.4046	67.4239	89.7418	87.1485
		90% trim	Leaky ReLU	0.01	50*50	200	100	95.9589	99.6493	93.3604	68.8586	86.9361	83.0924
		90% trim	Leaky ReLU	0.01	50*50	200	500	95.4089	99.8326	94.285	71.5766	89.8533	88.7059
		90% trim	Leaky ReLU	0.01	50*50	500	50	95.0662	99.7928	94.4444	67.1449	85.1586	86.8235
		90% trim	Leaky ReLU	0.01	50*50	500	100	94.7952	99.6652	94.843	69.7115	88.1157	86.4426
		90% trim	Leaky ReLU	0.01	50*50	500	500	96.5248	99.7609	94.301	70.0781	89.12	88.4706
		90% trim	Leaky ReLU	0.01	60*60	50	50	92.6032	99.8326	94.1655	69.7912	86.3861	88.6835
		90% trim	Leaky ReLU	0.01	60*60	50	100	94.7872	99.9681	94.3568	68.9303	85.1506	87.888
		90% trim	Leaky ReLU	0.01	60*60	50	500	94.3089	99.7689	95.6082	69.1774	88.9048	84.8291
		90% trim	Leaky ReLU	0.01	60*60	100	50	90.1642	99.4899	94.3408	68.8267	88.036	84.0336
		90% trim	Leaky ReLU	0.01	60*60	100	100	93.0575	99.9203	95.5364	69.281	89.5106	86.521
		90% trim	Leaky ReLU	0.01	60*60	100	500	95.0502	99.8645	94.9227	70.8592	89.5505	90.1064
		90% trim	Leaky ReLU	0.01	60*60	200	50	93.5996	99.7689	94.7633	68.5079	83.5964	84.2017
		90% trim	Leaky ReLU	0.01	60*60	200	100	93.7829	99.5377	95.7277	67.2963	83.5087	88.5042
		90% trim	Leaky ReLU	0.01	60*60	200	500	95.0662	99.7449	94.6278	70.1977	86.7527	88.5266
		90% trim	Leaky ReLU	0.01	60*60	500	50	93.5517	99.5457	96.6842	69.7115	88.0041	88.3585
		90% trim	Leaky ReLU	0.01	60*60	500	100	94.293	99.8884	95.664	69.7513	86.689	85.5574
		90% trim	Leaky ReLU	0.01	60*60	500	500	95.5125	99.7689	96.0306	69.5281	89.4628	88.7731

## Sheet: Random Seed 2
		Hyperparameters						Accuracy Values
								Questions
		Spectra Trimming	Activation function	Learning rate	Input size	Neurons in hidden layer	Batch size	1	2	3	4	5	6
		no trim	ReLU	0.001	40*40	50	50	95.935	100	97.832	77.6662	93.8466	77.1317
		no trim	ReLU	0.001	40*40	50	100	95.8792	100	97.6088	75.1315	92.7626	79.2045
		no trim	ReLU	0.001	40*40	50	500	95.3292	100	97.6008	75.9047	92.38	77.591
		no trim	ReLU	0.001	40*40	100	50	96.461	100	97.5689	75.2272	93.9981	79.1597
		no trim	ReLU	0.001	40*40	100	100	95.5285	100	97.553	76.893	94.1575	80.8739
		no trim	ReLU	0.001	40*40	100	500	96.1183	100	97.7762	76.1518	92.9539	77.6807
		no trim	ReLU	0.001	40*40	200	50	96.2458	100	97.274	77.8814	93.8546	79.7647
		no trim	ReLU	0.001	40*40	200	100	97.5769	100	97.3617	76.096	94.0619	79.2269
		no trim	ReLU	0.001	40*40	200	500	96.2219	100	97.282	75.0917	92.7786	77.4342
		no trim	ReLU	0.001	40*40	500	50	97.561	100	97.3936	79.1009	94.0061	79.5294
		no trim	ReLU	0.001	40*40	500	100	96.8914	100	97.4892	80.719	94.3727	79.8768
		no trim	ReLU	0.001	40*40	500	500	96.732	100	97.3697	78.3038	93.4322	77.9272
		no trim	ReLU	0.001	50*50	50	50	95.6241	100	95.911	77.4669	94.03	79.8319
		no trim	ReLU	0.001	50*50	50	100	96.206	100	97.4016	73.7446	93.743	78.1176
		no trim	ReLU	0.001	50*50	50	500	95.8951	100	97.9515	73.0671	93.1133	78.9804
		no trim	ReLU	0.001	50*50	100	50	96.461	100	97.9595	76.7655	93.3365	78.4874
		no trim	ReLU	0.001	50*50	100	100	95.9429	100	97.4494	75.3706	93.7351	79.6639
		no trim	ReLU	0.001	50*50	100	500	95.098	100	97.8399	74.7728	93.0416	78.0952
		no trim	ReLU	0.001	50*50	200	50	96.0944	100	97.4494	79.7465	94.2452	75.5294
		no trim	ReLU	0.001	50*50	200	100	96.5168	100	97.7204	81.9783	93.6394	80.2689
		no trim	ReLU	0.001	50*50	200	500	96.3016	100	97.4255	75.9844	93.8546	78.8571
		no trim	ReLU	0.001	50*50	500	50	95.5922	100	97.6407	80.3842	95.0821	77.3894
		no trim	ReLU	0.001	50*50	500	100	97.8718	100	97.6168	76.0641	95.1857	79.6527
		no trim	ReLU	0.001	50*50	500	500	96.0625	100	97.4494	77.993	93.7351	78.7787
		no trim	ReLU	0.001	60*60	50	50	95.9828	100	97.7921	79.2922	94.556	79.5294
		no trim	ReLU	0.001	60*60	50	100	95.935	100	97.003	74.6214	91.8938	77.7031
		no trim	ReLU	0.001	60*60	50	500	95.4727	100	97.6487	76.3909	92.117	77.9832
		no trim	ReLU	0.001	60*60	100	50	96.6603	100	97.7443	75.7293	94.2771	78.8011
		no trim	ReLU	0.001	60*60	100	100	96.0705	100	97.9436	76.2474	94.3249	78.5546
		no trim	ReLU	0.001	60*60	100	500	96.2219	100	97.5929	74.462	92.7467	78.3754
		no trim	ReLU	0.001	60*60	200	50	97.4892	100	97.3378	74.7808	94.2611	79.3838
		no trim	ReLU	0.001	60*60	200	100	97.3617	100	97.7921	78.1444	95.0024	80.4258
		no trim	ReLU	0.001	60*60	200	500	95.4567	100	97.282	73.6888	93.6235	77.3109
		no trim	ReLU	0.001	60*60	500	50	97.4494	100	97.0668	83.3891	94.7394	80.0896
		no trim	ReLU	0.001	60*60	500	100	97.3139	100	97.7523	82.2174	93.9901	80.112
		no trim	ReLU	0.001	60*60	500	500	96.6125	100	97.7602	77.1082	93.6394	80.2801
		no trim	ReLU	0.0001	40*40	50	50	94.7872	100	97.6646	73.1867	91.025	76.9636
		no trim	ReLU	0.0001	40*40	50	100	93.1373	100	97.3617	73.2903	88.9287	77.3669
		no trim	ReLU	0.0001	40*40	50	500	89.8613	100	97.0509	69.1615	77.3474	77.423
		no trim	ReLU	0.0001	40*40	100	50	95.7437	100	97.6168	74.741	91.6627	77.0644
		no trim	ReLU	0.0001	40*40	100	100	94.7633	100	97.8559	75.3786	90.6823	77.2661
		no trim	ReLU	0.0001	40*40	100	500	90.6903	100	97.011	69.831	81.9703	77.8263
		no trim	ReLU	0.0001	40*40	200	50	96.3096	100	97.3777	78.8458	93.1373	77.8263
		no trim	ReLU	0.0001	40*40	200	100	95.4408	100	97.553	73.4736	92.7865	77.9832
		no trim	ReLU	0.0001	40*40	200	500	92.9938	100	97.3777	71.465	85.7644	76.5042
		no trim	ReLU	0.0001	40*40	500	50	96.9552	100	96.9313	80.8146	92.8742	78.7563
		no trim	ReLU	0.0001	40*40	500	100	97.2182	100	97.3537	76.6858	92.922	78.3081
		no trim	ReLU	0.0001	40*40	500	500	94.6517	100	97.6965	73.0273	89.0722	77.5238
		no trim	ReLU	0.0001	50*50	50	50	94.03	100	97.4095	76.5503	91.8699	76.9412
		no trim	ReLU	0.0001	50*50	50	100	93.8546	100	97.4972	72.1345	91.0011	76.6723
		no trim	ReLU	0.0001	50*50	50	500	89.5106	100	97.1784	68.2927	81.5718	76.0784
		no trim	ReLU	0.0001	50*50	100	50	94.2771	100	97.8718	75.1873	91.8938	76.7507
		no trim	ReLU	0.0001	50*50	100	100	94.7314	100	97.9595	74.6692	91.8619	76.9412
		no trim	ReLU	0.0001	50*50	100	500	91.4076	100	97.2342	71.2657	85.0949	76
		no trim	ReLU	0.0001	50*50	200	50	96.0784	100	97.8081	76.7177	93.2807	77.1765
		no trim	ReLU	0.0001	50*50	200	100	95.4169	100	97.6487	76.9249	92.4916	77.972
		no trim	ReLU	0.0001	50*50	200	500	93.488	100	97.4653	72.5729	87.1274	77.0196
		no trim	ReLU	0.0001	50*50	500	50	97.5052	100	97.4334	78.3038	93.6474	79.5742
		no trim	ReLU	0.0001	50*50	500	100	97.5929	100	97.8798	79.619	93.3525	78.1513
		no trim	ReLU	0.0001	50*50	500	500	95.3451	100	97.561	74.3584	90.5149	78.1737
		no trim	ReLU	0.0001	60*60	50	50	95.1857	100	97.8957	74.8127	90.5069	77.0756
		no trim	ReLU	0.0001	60*60	50	100	94.4205	100	97.7284	74.0395	90.9214	77.2661
		no trim	ReLU	0.0001	60*60	50	500	90.6823	100	97.0509	69.7673	82.8631	76.8964
		no trim	ReLU	0.0001	60*60	100	50	95.7596	100	97.824	73.8164	92.9619	77.042
		no trim	ReLU	0.0001	60*60	100	100	94.7154	100	97.832	75.7851	91.7504	77.5574
		no trim	ReLU	0.0001	60*60	100	500	92.1887	100	97.282	71.0904	86.9281	77.1541
		no trim	ReLU	0.0001	60*60	200	50	96.4212	100	97.4972	75.9844	93.751	78.902
		no trim	ReLU	0.0001	60*60	200	100	96.198	100	97.7762	75.9525	93.7351	78.2073
		no trim	ReLU	0.0001	60*60	200	500	93.7669	100	97.3458	73.5533	88.0041	76.7171
		no trim	ReLU	0.0001	60*60	500	50	97.2262	100	97.4175	79.4277	93.5597	79.2269
		no trim	ReLU	0.0001	60*60	500	100	97.2661	100	97.3298	77.9212	93.3365	77.2997
		no trim	ReLU	0.0001	60*60	500	500	94.8509	100	97.1864	74.7091	91.296	77.3333
		no trim	ReLU	0.01	40*40	50	50	96.9871	100	96.9632	68.2927	94.2053	77.7815
		no trim	ReLU	0.01	40*40	50	100	97.4095	100	96.9632	73.4736	94.3488	77.2213
		no trim	ReLU	0.01	40*40	50	500	95.8712	100	97.6407	77.2198	93.9821	78.4538
		no trim	ReLU	0.01	40*40	100	50	97.1864	100	96.74	68.2927	90.3714	78.6667
		no trim	ReLU	0.01	40*40	100	100	97.1784	100	97.6168	73.0591	94.7314	78.7563
		no trim	ReLU	0.01	40*40	100	500	96.6125	100	97.4095	76.0402	93.5677	79.3501
		no trim	ReLU	0.01	40*40	200	50	97.9675	100	96.8197	68.2927	94.8191	76.9636
		no trim	ReLU	0.01	40*40	200	100	98.0791	100	96.9711	79.8342	93.9343	77.7927
		no trim	ReLU	0.01	40*40	200	500	97.7443	100	97.3298	77.4111	94.0459	81.972
		no trim	ReLU	0.01	40*40	500	50	97.3537	100	96.4451	68.3724	93.1452	76.5266
		no trim	ReLU	0.01	40*40	500	100	97.8718	100	96.9313	76.63	93.3604	79.7087
		no trim	ReLU	0.01	40*40	500	500	97.4255	100	97.5849	78.519	94.1176	78.4538
		no trim	ReLU	0.01	50*50	50	50	98.1747	100	96.8516	68.2927	93.5198	78.0056
		no trim	ReLU	0.01	50*50	50	100	97.2501	100	97.4733	74.3105	94.4285	78.8123
		no trim	ReLU	0.01	50*50	50	500	95.8313	100	97.824	73.0831	94.6676	80.6835
		no trim	ReLU	0.01	50*50	100	50	96.9552	100	96.6125	68.2927	91.2562	77.591
		no trim	ReLU	0.01	50*50	100	100	97.9436	100	97.6247	75.1714	93.6872	84.6162
		no trim	ReLU	0.01	50*50	100	500	98.0073	100	97.9595	81.6117	94.3488	76.5154
		no trim	ReLU	0.01	50*50	200	50	97.553	100	96.1661	68.2927	94.4763	78.028
		no trim	ReLU	0.01	50*50	200	100	97.8798	100	97.0429	74.996	93.1373	80.112
		no trim	ReLU	0.01	50*50	200	500	97.274	100	97.4016	77.6024	94.1894	80.6162
		no trim	ReLU	0.01	50*50	500	50	97.6168	100	96.74	68.2927	94.7553	79.7647
		no trim	ReLU	0.01	50*50	500	100	97.1784	100	96.6683	79.5234	94.1176	77.1429
		no trim	ReLU	0.01	50*50	500	500	97.5849	100	97.282	76.0721	94.3249	78.4538
		no trim	ReLU	0.01	60*60	50	50	97.6168	100	97.8957	68.2927	93.2329	79.3277
		no trim	ReLU	0.01	60*60	50	100	94.3488	100	97.5132	78.264	94.4365	78.9468
		no trim	ReLU	0.01	60*60	50	500	96.7639	100	97.9914	78.4712	94.2372	80.493
		no trim	ReLU	0.01	60*60	100	50	98.3341	100	97.2501	68.2927	93.0894	80.2353
		no trim	ReLU	0.01	60*60	100	100	98.0552	100	97.2421	75.1873	93.6553	76.5602
		no trim	ReLU	0.01	60*60	100	500	97.0668	100	97.2342	79.5871	93.7191	79.8992
		no trim	ReLU	0.01	60*60	200	50	96.5407	100	95.5285	68.2927	93.4401	76.3025
		no trim	ReLU	0.01	60*60	200	100	98.4617	100	97.4334	77.6662	94.4444	77.2885
		no trim	ReLU	0.01	60*60	200	500	96.9711	100	97.7284	80.3842	94.1814	80.1793
		no trim	ReLU	0.01	60*60	500	50	97.8798	100	96.3016	79.1168	93.8227	75.563
		no trim	ReLU	0.01	60*60	500	100	97.4414	100	96.8516	74.7728	94.3169	76.4594
		no trim	ReLU	0.01	60*60	500	500	97.2581	100	97.3856	71.744	94.3807	76.9748
		no trim	Leaky ReLU	0.001	40*40	50	50	98.1508	100	96.8914	82.7993	94.6118	78.7675
		no trim	Leaky ReLU	0.001	40*40	50	100	98.1747	100	97.3617	78.5988	93.3206	79.7199
		no trim	Leaky ReLU	0.001	40*40	50	500	97.0269	100	97.6646	79.5154	92.4677	77.7815
		no trim	Leaky ReLU	0.001	40*40	100	50	98.0153	100	97.3856	82.2254	94.4205	78.577
		no trim	Leaky ReLU	0.001	40*40	100	100	98.095	100	97.1385	78.1285	94.2213	78.1737
		no trim	Leaky ReLU	0.001	40*40	100	500	97.7044	100	97.6327	78.2162	93.9423	79.2381
		no trim	Leaky ReLU	0.001	40*40	200	50	98.111	100	97.3617	84.3456	94.5162	81.3333
		no trim	Leaky ReLU	0.001	40*40	200	100	97.274	100	97.5052	80.3045	93.9662	81.2325
		no trim	Leaky ReLU	0.001	40*40	200	500	97.6646	100	97.4334	79.6429	93.0257	78.8459
		no trim	Leaky ReLU	0.001	40*40	500	50	97.9834	100	97.4574	82.1616	95.0662	80.1793
		no trim	Leaky ReLU	0.001	40*40	500	100	98.1667	100	97.3777	81.3486	94.7473	79.2493
		no trim	Leaky ReLU	0.001	40*40	500	500	97.3936	100	97.3697	82.9348	93.4641	79.3165
		no trim	Leaky ReLU	0.001	50*50	50	50	97.816	100	97.4095	82.7116	92.9539	78.9356
		no trim	Leaky ReLU	0.001	50*50	50	100	97.6168	100	97.7044	80.8624	94.0539	78.3305
		no trim	Leaky ReLU	0.001	50*50	50	500	95.3451	100	97.9675	79.8342	92.3641	77.3333
		no trim	Leaky ReLU	0.001	50*50	100	50	97.3458	100	97.5052	79.6907	94.7792	78.5882
		no trim	Leaky ReLU	0.001	50*50	100	100	98.0631	100	97.3936	78.543	94.9147	80.8739
		no trim	Leaky ReLU	0.001	50*50	100	500	97.5211	100	97.5052	79.89	93.7749	78.9244
		no trim	Leaky ReLU	0.001	50*50	200	50	97.7044	100	97.4574	78.0408	94.7075	79.1933
		no trim	Leaky ReLU	0.001	50*50	200	100	97.4255	100	97.5929	84.234	94.03	77.2661
		no trim	Leaky ReLU	0.001	50*50	200	500	97.1306	100	96.9552	78.7263	93.9742	79.888
		no trim	Leaky ReLU	0.001	50*50	500	50	97.7602	100	97.3856	76.7575	95.2654	78.5994
		no trim	Leaky ReLU	0.001	50*50	500	100	97.4733	100	97.6407	85.4057	94.8031	77.2437
		no trim	Leaky ReLU	0.001	50*50	500	500	97.561	100	97.3298	80.2327	94.1256	77.9048
		no trim	Leaky ReLU	0.001	60*60	50	50	97.9197	100	97.0748	84.8557	94.4763	77.6807
		no trim	Leaky ReLU	0.001	60*60	50	100	97.9515	100	97.7842	73.4178	93.7111	81.6919
		no trim	Leaky ReLU	0.001	60*60	50	500	97.003	100	97.1704	76.6699	92.6112	78.958
		no trim	Leaky ReLU	0.001	60*60	100	50	97.5929	100	97.5132	81.9943	94.7633	79.4286
		no trim	Leaky ReLU	0.001	60*60	100	100	98.2783	100	97.2979	84.1224	94.6517	78.2745
		no trim	Leaky ReLU	0.001	60*60	100	500	97.6407	100	97.3936	80.1451	93.0735	77.9608
		no trim	Leaky ReLU	0.001	60*60	200	50	98.1269	100	97.3936	84.0507	94.2691	79.8543
		no trim	Leaky ReLU	0.001	60*60	200	100	98.1667	100	97.29	82.0421	95.114	80.3585
		no trim	Leaky ReLU	0.001	60*60	200	500	97.6885	100	97.2103	82.5203	94.4843	80.1457
		no trim	Leaky ReLU	0.001	60*60	500	50	97.0588	100	97.1943	84.1224	95.4089	79.4174
		no trim	Leaky ReLU	0.001	60*60	500	100	97.6008	100	97.5929	82.4805	94.9944	79.5854
		no trim	Leaky ReLU	0.001	60*60	500	500	97.3936	100	97.4494	80.0096	93.8626	79.0476
		no trim	Leaky ReLU	0.0001	40*40	50	50	95.1618	100	97.6247	76.4228	89.8932	77.7143
		no trim	Leaky ReLU	0.0001	40*40	50	100	95.0024	100	97.6646	73.1548	88.6179	77.0644
		no trim	Leaky ReLU	0.0001	40*40	50	500	90.1642	100	96.477	68.8267	78.3995	78.1849
		no trim	Leaky ReLU	0.0001	40*40	100	50	96.1103	100	97.4175	78.3278	92.8025	77.5798
		no trim	Leaky ReLU	0.0001	40*40	100	100	95.7516	100	97.8798	74.1671	91.1605	77.2549
		no trim	Leaky ReLU	0.0001	40*40	100	500	92.2685	100	97.1784	70.2535	81.7791	77.6022
		no trim	Leaky ReLU	0.0001	40*40	200	50	96.9552	100	97.7204	79.2603	93.2807	77.8711
		no trim	Leaky ReLU	0.0001	40*40	200	100	96.1741	100	97.6885	76.8691	92.1808	76.986
		no trim	Leaky ReLU	0.0001	40*40	200	500	93.8546	100	97.4653	71.3614	85.6687	76.8739
		no trim	Leaky ReLU	0.0001	40*40	500	50	97.0349	100	97.0827	80.448	93.759	78.5658
		no trim	Leaky ReLU	0.0001	40*40	500	100	97.6008	100	97.9914	79.8342	93.0257	78.9916
		no trim	Leaky ReLU	0.0001	40*40	500	500	95.7995	100	97.3458	75.2272	89.0084	77.3333
		no trim	Leaky ReLU	0.0001	50*50	50	50	96.5407	100	97.8957	73.8961	91.6786	77.2213
		no trim	Leaky ReLU	0.0001	50*50	50	100	95.4248	100	97.816	75.2511	90.9055	77.2437
		no trim	Leaky ReLU	0.0001	50*50	50	500	92.1409	100	97.019	69.5441	81.7233	77.6583
		no trim	Leaky ReLU	0.0001	50*50	100	50	96.2458	100	97.8001	78.6864	92.3721	77.0084
		no trim	Leaky ReLU	0.0001	50*50	100	100	96.1661	100	97.6646	77.8734	91.567	77.4006
		no trim	Leaky ReLU	0.0001	50*50	100	500	93.1293	100	97.2182	72.0947	84.9753	77.0756
		no trim	Leaky ReLU	0.0001	50*50	200	50	97.0668	100	97.6726	77.0843	93.2967	78.409
		no trim	Leaky ReLU	0.0001	50*50	200	100	96.7799	100	97.9994	79.4994	92.8583	77.5574
		no trim	Leaky ReLU	0.0001	50*50	200	500	94.6198	100	97.4972	73.5055	87.6295	77.1429
		no trim	Leaky ReLU	0.0001	50*50	500	50	97.8479	100	97.6726	77.9691	93.6235	79.2493
		no trim	Leaky ReLU	0.0001	50*50	500	100	97.3697	100	97.2103	80.0175	93.3604	77.7703
		no trim	Leaky ReLU	0.0001	50*50	500	500	96.5248	100	97.561	76.0561	91.1844	77.4006
		no trim	Leaky ReLU	0.0001	60*60	50	50	96.2538	100	97.8639	77.5068	91.5511	79.2381
		no trim	Leaky ReLU	0.0001	60*60	50	100	95.6799	100	97.6885	75.0837	90.2838	77.1429
		no trim	Leaky ReLU	0.0001	60*60	50	500	91.9417	100	97.1943	71.3614	83.5645	77.5686
		no trim	Leaky ReLU	0.0001	60*60	100	50	96.8675	100	97.7363	78.9495	91.7822	77.1765
		no trim	Leaky ReLU	0.0001	60*60	100	100	95.0502	100	97.7044	78.9495	93.4481	77.0756
		no trim	Leaky ReLU	0.0001	60*60	100	500	93.8785	100	97.3537	71.6722	86.6332	77.1317
		no trim	Leaky ReLU	0.0001	60*60	200	50	97.6726	100	97.2979	83.3971	93.48	76.4594
		no trim	Leaky ReLU	0.0001	60*60	200	100	96.6922	100	97.832	78.4553	92.7228	79.1597
		no trim	Leaky ReLU	0.0001	60*60	200	500	95.098	100	97.6805	75.1554	89.1041	77.8151
		no trim	Leaky ReLU	0.0001	60*60	500	50	97.6008	100	97.4016	82.6558	93.9343	79.3165
		no trim	Leaky ReLU	0.0001	60*60	500	100	97.5929	100	97.4016	80.1929	93.3923	77.2997
		no trim	Leaky ReLU	0.0001	60*60	500	500	96.198	100	97.3697	77.18	91.846	77.972
		no trim	Leaky ReLU	0.01	40*40	50	50	95.114	100	97.2023	78.3676	93.8626	78.902
		no trim	Leaky ReLU	0.01	40*40	50	100	95.5603	100	96.7161	80.5755	92.6192	78.5994
		no trim	Leaky ReLU	0.01	40*40	50	500	96.9871	100	97.9117	81.2849	93.5756	80.605
		no trim	Leaky ReLU	0.01	40*40	100	50	97.8001	100	97.3219	80.8385	94.285	77.1429
		no trim	Leaky ReLU	0.01	40*40	100	100	97.282	100	97.0987	80.9501	93.8148	79.6863
		no trim	Leaky ReLU	0.01	40*40	100	500	96.8755	100	98.2225	82.6638	94.3169	82.1625
		no trim	Leaky ReLU	0.01	40*40	200	50	97.8479	100	96.2219	81.4682	93.1532	76.8739
		no trim	Leaky ReLU	0.01	40*40	200	100	98.2385	100	97.1624	80.974	94.3329	78.7115
		no trim	Leaky ReLU	0.01	40*40	200	500	97.3378	100	97.3777	84.4173	94.5162	79.3053
		no trim	Leaky ReLU	0.01	40*40	500	50	98.0392	100	96.1661	75.809	94.2691	78.7563
		no trim	Leaky ReLU	0.01	40*40	500	100	97.9515	100	97.4016	82.4805	94.1734	78.3081
		no trim	Leaky ReLU	0.01	40*40	500	500	98.2066	100	97.3059	84.6804	93.6713	78.9356
		no trim	Leaky ReLU	0.01	50*50	50	50	98.2225	100	97.1784	76.7097	93.3923	77.8039
		no trim	Leaky ReLU	0.01	50*50	50	100	97.2103	100	97.1465	83.1659	94.0698	79.9216
		no trim	Leaky ReLU	0.01	50*50	50	500	94.7952	100	97.4733	80.5914	93.6952	79.8543
		no trim	Leaky ReLU	0.01	50*50	100	50	98.5254	100	97.4414	78.1683	93.3286	78.5994
		no trim	Leaky ReLU	0.01	50*50	100	100	97.9914	100	97.2103	78.527	94.0778	79.1373
		no trim	Leaky ReLU	0.01	50*50	100	500	97.1624	100	97.6008	74.9721	93.5438	77.972
		no trim	Leaky ReLU	0.01	50*50	200	50	97.6088	100	96.8038	81.5638	94.0698	77.6134
		no trim	Leaky ReLU	0.01	50*50	200	100	97.6407	100	96.8436	80.9342	94.0778	78.8459
		no trim	Leaky ReLU	0.01	50*50	200	500	97.8559	100	97.9276	84.4492	94.0379	82.3417
		no trim	Leaky ReLU	0.01	50*50	500	50	96.6204	100	96.4052	83.413	90.6663	80.6835
		no trim	Leaky ReLU	0.01	50*50	500	100	98.2624	100	97.6965	81.5399	94.0778	78.2297
		no trim	Leaky ReLU	0.01	50*50	500	500	97.9595	100	97.3219	83.2457	93.5756	80.4706
		no trim	Leaky ReLU	0.01	60*60	50	50	98.1907	100	96.4371	75.5619	92.2924	76.4034
		no trim	Leaky ReLU	0.01	60*60	50	100	96.8835	100	97.0349	81.0059	94.0937	77.2213
		no trim	Leaky ReLU	0.01	60*60	50	500	96.748	100	97.7443	77.0604	93.5198	79.0476
		no trim	Leaky ReLU	0.01	60*60	100	50	96.748	100	96.5646	78.3437	93.9582	76.605
		no trim	Leaky ReLU	0.01	60*60	100	100	97.6805	100	96.5886	78.6944	93.5677	78.8796
		no trim	Leaky ReLU	0.01	60*60	100	500	97.0429	100	97.4095	76.6619	94.1256	78.8459
		no trim	Leaky ReLU	0.01	60*60	200	50	96.1342	100	96.8516	73.1787	91.2004	77.2997
		no trim	Leaky ReLU	0.01	60*60	200	100	98.0711	100	97.1864	77.1481	94.6278	77.7591
		no trim	Leaky ReLU	0.01	60*60	200	500	97.3378	100	97.2661	84.6326	94.3568	79.3277
		no trim	Leaky ReLU	0.01	60*60	500	50	97.8957	100	96.2378	78.272	92.5634	76.8179
		no trim	Leaky ReLU	0.01	60*60	500	100	96.7559	100	96.7001	83.1261	93.6235	78.6891
		no trim	Leaky ReLU	0.01	60*60	500	500	97.8957	100	97.1465	77.164	94.0937	79.5518
		95% trim	ReLU	0.001	40*40	50	50	96.3096	99.992	94.0061	67.7985	86.7049	90.028
		95% trim	ReLU	0.001	40*40	50	100	93.48	100	93.9184	67.671	87.9882	91.1485
		95% trim	ReLU	0.001	40*40	50	500	93.1771	99.992	92.109	68.4122	85.7325	90.1849
		95% trim	ReLU	0.001	40*40	100	50	93.2967	100	94.7952	67.9579	88.2194	88.6611
		95% trim	ReLU	0.001	40*40	100	100	93.1213	99.992	95.6241	67.1529	87.8447	90.1849
		95% trim	ReLU	0.001	40*40	100	500	94.8988	100	93.8945	67.4079	87.3984	89.9272
		95% trim	ReLU	0.001	40*40	200	50	96.19	100	95.3053	67.7029	87.0397	90.6443
		95% trim	ReLU	0.001	40*40	200	100	94.8669	99.992	95.4806	68.0615	88.3628	88.5826
		95% trim	ReLU	0.001	40*40	200	500	95.5444	99.992	95.0741	68.8666	87.3346	90.7787
		95% trim	ReLU	0.001	40*40	500	50	95.927	99.992	95.5763	67.8862	88.7295	89.0868
		95% trim	ReLU	0.001	40*40	500	100	96.2219	99.992	95.4169	69.9506	87.9085	88.4818
		95% trim	ReLU	0.001	40*40	500	500	94.8988	99.992	95.1379	69.8948	88.0998	89.3109
		95% trim	ReLU	0.001	50*50	50	50	95.0582	100	94.8031	68.3963	88.6418	85.9384
		95% trim	ReLU	0.001	50*50	50	100	95.4009	99.992	94.014	67.5674	87.0158	90.9916
		95% trim	ReLU	0.001	50*50	50	500	92.6829	99.992	93.4162	67.7746	86.2347	90.8571
		95% trim	ReLU	0.001	50*50	100	50	96.0226	99.992	94.7553	67.4797	85.4854	89.0532
		95% trim	ReLU	0.001	50*50	100	100	95.9748	99.992	95.2415	67.7666	88.0281	89.042
		95% trim	ReLU	0.001	50*50	100	500	95.2335	99.992	93.4481	67.5036	87.4621	92.3025
		95% trim	ReLU	0.001	50*50	200	50	95.4089	99.992	95.098	68.4122	88.3469	91.9104
		95% trim	ReLU	0.001	50*50	200	100	95.0343	99.992	96.1342	69.0658	88.2194	89.0756
		95% trim	ReLU	0.001	50*50	200	500	95.6958	100	94.1495	68.3883	87.8128	90.2521
		95% trim	ReLU	0.001	50*50	500	50	96.6125	99.992	94.9227	68.8427	90.22	90.577
		95% trim	ReLU	0.001	50*50	500	100	96.3813	100	95.7198	68.3963	89.2316	89.8039
		95% trim	ReLU	0.001	50*50	500	500	95.2335	99.992	95.3611	68.2449	87.8846	90.2521
		95% trim	ReLU	0.001	60*60	50	50	94.9227	99.9203	95.6719	67.5913	86.9839	88.6947
		95% trim	ReLU	0.001	60*60	50	100	93.6793	99.992	93.9423	67.7586	86.41	88.8739
		95% trim	ReLU	0.001	60*60	50	500	92.5873	99.992	93.1851	67.2007	86.1789	91.3613
		95% trim	ReLU	0.001	60*60	100	50	95.5125	100	95.122	67.0572	88.1476	89.2885
		95% trim	ReLU	0.001	60*60	100	100	94.9785	99.992	93.9343	69.9426	88.0041	89.2997
		95% trim	ReLU	0.001	60*60	100	500	93.0974	100	93.0018	66.0609	87.5737	90.8123
		95% trim	ReLU	0.001	60*60	200	50	95.6719	100	93.5517	68.4362	88.8729	88.6723
		95% trim	ReLU	0.001	60*60	200	100	95.1618	99.992	94.8988	67.8862	87.4861	88.5714
		95% trim	ReLU	0.001	60*60	200	500	94.7234	100	93.5756	68.4122	88.2273	90.9916
		95% trim	ReLU	0.001	60*60	500	50	96.2139	99.9761	95.4806	68.8506	89.144	90.3866
		95% trim	ReLU	0.001	60*60	500	100	95.64	99.992	94.6756	67.926	89.5425	87.7535
		95% trim	ReLU	0.001	60*60	500	500	95.2256	100	95.3531	68.6115	88.9606	89.7367
		95% trim	ReLU	0.0001	40*40	50	50	93.1452	99.992	92.9858	67.8065	84.1942	91.3053
		95% trim	ReLU	0.0001	40*40	50	100	92.5793	100	92.3641	67.0493	83.3413	90.8347
		95% trim	ReLU	0.0001	40*40	50	500	90.5627	99.9681	90.3794	68.1094	79.1806	87.3165
		95% trim	ReLU	0.0001	40*40	100	50	93.8706	99.992	94.2531	67.4558	86.0593	91.5406
		95% trim	ReLU	0.0001	40*40	100	100	93.7988	99.992	93.5358	66.6507	84.792	91.8319
		95% trim	ReLU	0.0001	40*40	100	500	91.583	99.992	91.3199	67.8144	80.7907	89.423
		95% trim	ReLU	0.0001	40*40	200	50	95.3611	99.992	94.1017	68.0456	87.5498	90.3978
		95% trim	ReLU	0.0001	40*40	200	100	94.5321	99.992	93.8148	66.9775	86.4738	91.0028
		95% trim	ReLU	0.0001	40*40	200	500	92.8583	99.992	92.6829	67.4956	82.9986	90.1625
		95% trim	ReLU	0.0001	40*40	500	50	95.8792	99.992	95.0183	68.0934	87.5737	90.4314
		95% trim	ReLU	0.0001	40*40	500	100	96.1581	99.992	94.6437	67.4876	87.4063	91.4286
		95% trim	ReLU	0.0001	40*40	500	500	94.022	99.992	93.8945	66.6826	84.8876	91.0476
		95% trim	ReLU	0.0001	50*50	50	50	93.6075	99.992	92.5873	66.1247	84.505	91.5854
		95% trim	ReLU	0.0001	50*50	50	100	92.9141	100	91.8779	67.2406	83.979	90.7227
		95% trim	ReLU	0.0001	50*50	50	500	91.3199	99.9841	90.9692	67.8702	80.3364	88.2801
		95% trim	ReLU	0.0001	50*50	100	50	93.7908	99.992	93.4083	67.6311	85.6767	91.0028
		95% trim	ReLU	0.0001	50*50	100	100	93.759	99.992	93.8706	66.8739	84.776	91.7647
		95% trim	ReLU	0.0001	50*50	100	500	92.5395	99.992	91.1765	67.3362	82.5044	89.7591
		95% trim	ReLU	0.0001	50*50	200	50	95.3531	99.992	94.7075	67.9579	87.3505	92.1793
		95% trim	ReLU	0.0001	50*50	200	100	94.7633	99.992	93.6394	67.121	86.5455	91.8992
		95% trim	ReLU	0.0001	50*50	200	500	93.0894	99.992	92.3482	67.7507	83.2775	91.5854
		95% trim	ReLU	0.0001	50*50	500	50	95.9987	99.992	95.4727	68.1811	87.5179	90.0392
		95% trim	ReLU	0.0001	50*50	500	100	95.8473	99.992	94.5002	67.6231	86.8085	91.5182
		95% trim	ReLU	0.0001	50*50	500	500	94.3966	99.992	93.4401	66.5949	84.8398	91.1485
		95% trim	ReLU	0.0001	60*60	50	50	92.4518	99.992	92.7626	67.6231	85.1267	90.3978
		95% trim	ReLU	0.0001	60*60	50	100	92.3721	99.992	92.2844	67.2485	83.963	91.3277
		95% trim	ReLU	0.0001	60*60	50	500	91.3837	99.992	91.4236	68.2847	81.6117	89.9048
		95% trim	ReLU	0.0001	60*60	100	50	93.4481	99.992	93.5597	66.3319	87.4223	89.8263
		95% trim	ReLU	0.0001	60*60	100	100	93.2648	100	93.0655	67.1927	85.9238	91.0812
		95% trim	ReLU	0.0001	60*60	100	500	92.8663	99.992	90.8895	67.6471	82.1138	90.9692
		95% trim	ReLU	0.0001	60*60	200	50	95.0024	99.992	94.0619	66.5551	87.4781	90.1625
		95% trim	ReLU	0.0001	60*60	200	100	94.9625	99.992	93.3206	66.579	86.8484	90.4426
		95% trim	ReLU	0.0001	60*60	200	500	92.6351	99.992	92.4358	67.113	84.3615	91.7423
		95% trim	ReLU	0.0001	60*60	500	50	95.5683	99.992	94.4524	67.8463	88.0121	90.465
		95% trim	ReLU	0.0001	60*60	500	100	95.2017	99.992	93.5358	66.3797	87.239	90.8123
		95% trim	ReLU	0.0001	60*60	500	500	94.2372	99.992	93.7351	66.6109	85.5332	91.6751
		95% trim	ReLU	0.01	40*40	50	50	94.7712	100	96.2299	68.2927	88.3788	87.451
		95% trim	ReLU	0.01	40*40	50	100	95.4408	99.992	95.7676	68.2927	86.9839	88.9972
		95% trim	ReLU	0.01	40*40	50	500	96.1183	99.9601	93.0097	68.6992	87.3585	88.8291
		95% trim	ReLU	0.01	40*40	100	50	94.1097	99.9362	95.6958	68.2927	86.952	86.6443
		95% trim	ReLU	0.01	40*40	100	100	94.6357	99.9522	96.5726	68.2927	89.0244	86.5322
		95% trim	ReLU	0.01	40*40	100	500	94.1734	99.8406	95.6958	68.6514	89.4707	89.7591
		95% trim	ReLU	0.01	40*40	200	50	95.106	100	96.2857	68.2927	88.8251	87.2605
		95% trim	ReLU	0.01	40*40	200	100	95.122	99.9522	96.1422	71.0665	88.2433	88.5938
		95% trim	ReLU	0.01	40*40	200	500	95.2893	99.992	95.7835	71.7041	88.2831	86.409
		95% trim	ReLU	0.01	40*40	500	50	95.9987	99.9761	96.1103	68.2927	86.7607	87.395
		95% trim	ReLU	0.01	40*40	500	100	95.1379	99.9681	95.4966	69.4803	89.399	88.0336
		95% trim	ReLU	0.01	40*40	500	500	95.2495	99.9601	96.206	69.289	88.2672	89.9384
		95% trim	ReLU	0.01	50*50	50	50	93.7829	99.9123	94.9864	68.2927	87.9165	88.9972
		95% trim	ReLU	0.01	50*50	50	100	94.2452	99.8565	96.6683	68.2927	88.6817	89.423
		95% trim	ReLU	0.01	50*50	50	500	95.0024	99.992	95.2893	71.8795	86.8803	88.7059
		95% trim	ReLU	0.01	50*50	100	50	93.8706	99.992	95.5683	68.2927	87.9962	89.1653
		95% trim	ReLU	0.01	50*50	100	100	95.1698	99.8725	94.4126	68.2927	89.0005	89.591
		95% trim	ReLU	0.01	50*50	100	500	94.5799	99.8645	94.6517	71.4889	88.4824	89.8824
		95% trim	ReLU	0.01	50*50	200	50	95.8234	99.992	95.6161	68.2927	87.8527	86.3417
		95% trim	ReLU	0.01	50*50	200	100	95.2973	99.9283	95.4567	68.2927	88.9527	87.1933
		95% trim	ReLU	0.01	50*50	200	500	94.5799	99.8326	96.1263	68.9702	87.0875	87.6863
		95% trim	ReLU	0.01	50*50	500	50	93.8546	99.9601	95.6161	68.2927	89.6302	84.7395
		95% trim	ReLU	0.01	50*50	500	100	92.2924	99.8884	95.927	70.6042	87.5418	85.2773
		95% trim	ReLU	0.01	50*50	500	500	95.6082	99.9681	96.5726	68.484	88.4346	89.4566
		95% trim	ReLU	0.01	60*60	50	50	94.3966	100	95.7995	68.2927	85.6608	86.7003
		95% trim	ReLU	0.01	60*60	50	100	93.2329	99.992	94.0619	68.2927	87.5658	85.1989
		95% trim	ReLU	0.01	60*60	50	500	94.6995	100	94.8988	67.4876	88.4106	88.1457
		95% trim	ReLU	0.01	60*60	100	50	93.9343	99.9123	95.8712	68.2927	86.3383	83.8431
		95% trim	ReLU	0.01	60*60	100	100	93.8706	99.992	96.1263	68.2927	83.1978	89.3557
		95% trim	ReLU	0.01	60*60	100	500	95.3212	99.9761	94.293	68.3325	89.3034	88.0336
		95% trim	ReLU	0.01	60*60	200	50	93.1771	99.9362	94.572	68.2927	85.9158	89.4566
		95% trim	ReLU	0.01	60*60	200	100	95.0741	99.8087	95.8393	68.2927	87.5578	83.888
		95% trim	ReLU	0.01	60*60	200	500	95.4567	99.9283	95.4248	66.6587	88.5302	90.1401
		95% trim	ReLU	0.01	60*60	500	50	94.1176	99.9283	96.469	68.2927	86.5216	88.7283
		95% trim	ReLU	0.01	60*60	500	100	94.6198	99.8645	96.5726	68.2927	88.0918	82.4874
		95% trim	ReLU	0.01	60*60	500	500	94.0459	99.8486	95.6799	66.5471	88.5462	88.7507
		95% trim	Leaky ReLU	0.001	40*40	50	50	95.7835	100	95.6241	68.1731	87.0238	87.3838
		95% trim	Leaky ReLU	0.001	40*40	50	100	95.1618	99.992	95.7198	67.5674	87.9882	89.3894
		95% trim	Leaky ReLU	0.001	40*40	50	500	94.6676	99.992	94.2213	68.739	86.1789	91.395
		95% trim	Leaky ReLU	0.001	40*40	100	50	95.5922	100	95.1937	70.7158	88.857	89.2549
		95% trim	Leaky ReLU	0.001	40*40	100	100	94.5162	99.992	95.7437	70.11	88.2194	87.1148
		95% trim	Leaky ReLU	0.001	40*40	100	500	95.0104	100	94.1894	68.1811	88.586	91.1036
		95% trim	Leaky ReLU	0.001	40*40	200	50	95.7277	99.9681	95.385	68.9224	89.2715	88.6499
		95% trim	Leaky ReLU	0.001	40*40	200	100	95.7437	99.992	95.9589	68.468	89.2555	89.6919
		95% trim	Leaky ReLU	0.001	40*40	200	500	95.2575	100	94.9705	68.2528	88.2433	90.6779
		95% trim	Leaky ReLU	0.001	40*40	500	50	95.7277	99.992	95.8792	69.7991	90.0287	90.1513
		95% trim	Leaky ReLU	0.001	40*40	500	100	96.0067	100	95.5285	69.4086	89.4548	89.0084
		95% trim	Leaky ReLU	0.001	40*40	500	500	95.6958	99.9442	95.106	68.6832	88.6976	89.9048
		95% trim	Leaky ReLU	0.001	50*50	50	50	95.2973	99.9522	96.0226	68.5318	87.5897	88.1345
		95% trim	Leaky ReLU	0.001	50*50	50	100	96.0465	99.992	94.4046	67.2485	88.1795	88.8291
		95% trim	Leaky ReLU	0.001	50*50	50	500	95.2415	99.992	94.0539	67.2246	88.1875	90.2969
		95% trim	Leaky ReLU	0.001	50*50	100	50	96.2458	99.9522	95.2495	70.102	88.6976	88.3697
		95% trim	Leaky ReLU	0.001	50*50	100	100	95.9828	99.992	95.3053	68.8905	87.9882	86.5994
		95% trim	Leaky ReLU	0.001	50*50	100	500	95.6879	99.9601	93.8148	68.4282	87.1832	90.5434
		95% trim	Leaky ReLU	0.001	50*50	200	50	96.2538	99.9841	95.2973	68.9383	86.2984	89.7703
		95% trim	Leaky ReLU	0.001	50*50	200	100	95.2734	99.9841	95.2654	67.7188	89.0563	88.9748
		95% trim	Leaky ReLU	0.001	50*50	200	500	95.393	99.992	94.827	67.6789	88.6019	90.409
		95% trim	Leaky ReLU	0.001	50*50	500	50	95.5125	99.9841	95.7357	71.2339	89.7577	91.7087
		95% trim	Leaky ReLU	0.001	50*50	500	100	95.9429	99.9123	95.6321	68.9463	89.2795	90.5994
		95% trim	Leaky ReLU	0.001	50*50	500	500	94.835	99.9522	94.3966	69.5999	88.1396	90.7003
		95% trim	Leaky ReLU	0.001	60*60	50	50	95.7995	100	96.198	69.3129	87.765	87.2829
		95% trim	Leaky ReLU	0.001	60*60	50	100	95.4966	99.992	94.7314	67.6391	87.4542	87.9216
		95% trim	Leaky ReLU	0.001	60*60	50	500	95.3531	99.992	93.9024	66.8261	87.4701	91.5518
		95% trim	Leaky ReLU	0.001	60*60	100	50	95.6161	100	95.5683	69.3448	90.8656	86.2969
		95% trim	Leaky ReLU	0.001	60*60	100	100	95.8393	99.9442	93.3604	67.7268	88.323	88.9412
		95% trim	Leaky ReLU	0.001	60*60	100	500	95.2575	99.992	95.0741	68.3564	86.7288	89.9048
		95% trim	Leaky ReLU	0.001	60*60	200	50	95.3212	99.992	95.6241	70.3013	88.7135	87.3501
		95% trim	Leaky ReLU	0.001	60*60	200	100	94.9944	99.8964	95.8074	69.9984	88.865	89.0084
		95% trim	Leaky ReLU	0.001	60*60	200	500	94.6517	99.9044	93.9024	66.6587	88.3549	90.8459
		95% trim	Leaky ReLU	0.001	60*60	500	50	95.4328	99.9681	95.5285	69.9904	88.4346	90.3866
		95% trim	Leaky ReLU	0.001	60*60	500	100	95.6321	99.992	95.5285	69.4086	87.8288	89.7703
		95% trim	Leaky ReLU	0.001	60*60	500	500	94.9067	99.9841	94.0778	68.476	88.7454	90.1064
		95% trim	Leaky ReLU	0.0001	40*40	50	50	93.2967	99.992	92.659	67.392	84.8478	91.7535
		95% trim	Leaky ReLU	0.0001	40*40	50	100	92.4358	99.992	92.2127	67.4956	83.429	90.5882
		95% trim	Leaky ReLU	0.0001	40*40	50	500	91.1127	99.9681	90.5069	67.7188	79.5393	87.3501
		95% trim	Leaky ReLU	0.0001	40*40	100	50	94.5879	99.992	94.285	67.7985	86.0115	90.5098
		95% trim	Leaky ReLU	0.0001	40*40	100	100	94.0937	100	92.6032	67.5195	85.2622	90.9804
		95% trim	Leaky ReLU	0.0001	40*40	100	500	91.583	99.992	91.2881	67.7188	82.0979	89.6471
		95% trim	Leaky ReLU	0.0001	40*40	200	50	95.8712	99.992	94.5321	67.7108	87.4621	89.7031
		95% trim	Leaky ReLU	0.0001	40*40	200	100	94.8988	100	93.5996	67.4079	86.418	91.0924
		95% trim	Leaky ReLU	0.0001	40*40	200	500	92.6271	99.992	92.2605	67.5116	82.6797	90.902
		95% trim	Leaky ReLU	0.0001	40*40	500	50	95.935	99.992	94.9466	67.9579	88.2512	90.7339
		95% trim	Leaky ReLU	0.0001	40*40	500	100	95.935	99.992	94.5002	67.5594	87.4382	91.2157
		95% trim	Leaky ReLU	0.0001	40*40	500	500	93.7111	99.992	93.3525	66.6906	85.2144	91.7871
		95% trim	Leaky ReLU	0.0001	50*50	50	50	93.4959	99.992	91.9895	66.9775	85.4615	90.9132
		95% trim	Leaky ReLU	0.0001	50*50	50	100	93.4242	99.992	92.8184	66.5152	84.0746	91.6863
		95% trim	Leaky ReLU	0.0001	50*50	50	500	91.1924	99.9761	91.7344	67.5992	80.974	88.6723
		95% trim	Leaky ReLU	0.0001	50*50	100	50	94.3727	99.992	93.6633	67.5753	86.6412	90.7899
		95% trim	Leaky ReLU	0.0001	50*50	100	100	94.0858	99.992	93.3604	67.392	86.5615	91.6415
		95% trim	Leaky ReLU	0.0001	50*50	100	500	92.4996	99.992	91.8619	67.3123	83.2138	89.9832
		95% trim	Leaky ReLU	0.0001	50*50	200	50	95.6002	99.992	93.751	66.9377	88.4106	91.1485
		95% trim	Leaky ReLU	0.0001	50*50	200	100	95.0183	99.9601	93.8865	67.7985	86.5136	91.4734
		95% trim	Leaky ReLU	0.0001	50*50	200	500	92.8902	99.9681	92.5076	66.8341	83.7478	91.1036
		95% trim	Leaky ReLU	0.0001	50*50	500	50	96.0226	99.992	94.7792	68.1014	88.323	91.3613
		95% trim	Leaky ReLU	0.0001	50*50	500	100	95.6958	99.992	94.6517	67.0333	88.2194	90.9916
		95% trim	Leaky ReLU	0.0001	50*50	500	500	94.3807	99.9841	93.4481	66.9138	85.5173	91.2157
		95% trim	Leaky ReLU	0.0001	60*60	50	50	92.8423	99.992	94.2133	66.6507	86.3861	90.3417
		95% trim	Leaky ReLU	0.0001	60*60	50	100	93.2887	100	93.3843	66.571	85.2224	90.8796
		95% trim	Leaky ReLU	0.0001	60*60	50	500	92.388	99.992	91.2881	67.5355	81.4602	89.3782
		95% trim	Leaky ReLU	0.0001	60*60	100	50	94.8111	99.992	93.9024	66.858	87.1911	90.9916
		95% trim	Leaky ReLU	0.0001	60*60	100	100	94.022	99.992	93.1293	66.4435	85.7963	90.6443
		95% trim	Leaky ReLU	0.0001	60*60	100	500	93.3445	99.992	91.5272	67.1927	84.0666	91.3613
		95% trim	Leaky ReLU	0.0001	60*60	200	50	94.8908	99.992	94.1894	67.5434	87.5737	90.2745
		95% trim	Leaky ReLU	0.0001	60*60	200	100	94.5082	99.992	94.0459	67.2326	87.5259	91.507
		95% trim	Leaky ReLU	0.0001	60*60	200	500	93.48	99.992	92.3003	66.8261	85.055	91.7199
		95% trim	Leaky ReLU	0.0001	60*60	500	50	95.2256	99.992	94.9147	68.0456	87.4303	90.0728
		95% trim	Leaky ReLU	0.0001	60*60	500	100	95.3053	99.992	95.0024	68.5876	87.7092	90.3081
		95% trim	Leaky ReLU	0.0001	60*60	500	500	94.2452	99.992	93.1293	66.2602	86.0354	91.3725
		95% trim	Leaky ReLU	0.01	40*40	50	50	95.935	99.992	95.9429	68.4362	87.9643	86.3417
		95% trim	Leaky ReLU	0.01	40*40	50	100	93.0974	99.9841	95.4328	69.1615	88.8809	89.916
		95% trim	Leaky ReLU	0.01	40*40	50	500	93.6235	99.9761	94.7154	67.5674	89.1918	86.7899
		95% trim	Leaky ReLU	0.01	40*40	100	50	95.3132	99.9601	96.2139	68.739	85.9955	89.4454
		95% trim	Leaky ReLU	0.01	40*40	100	100	94.9625	99.9681	96.0625	68.0376	87.6853	88.2353
		95% trim	Leaky ReLU	0.01	40*40	100	500	95.2415	99.8486	94.8589	70.2694	89.4628	89.1317
		95% trim	Leaky ReLU	0.01	40*40	200	50	94.8988	99.992	95.8313	69.7433	88.2512	88.1232
		95% trim	Leaky ReLU	0.01	40*40	200	100	95.2096	99.9442	96.1342	68.8427	88.5302	87.7535
		95% trim	Leaky ReLU	0.01	40*40	200	500	95.393	99.8725	95.8951	69.6796	88.4744	88.2017
		95% trim	Leaky ReLU	0.01	40*40	500	50	96.4052	100	95.2575	69.568	90.0606	86.6331
		95% trim	Leaky ReLU	0.01	40*40	500	100	94.5002	99.9123	96.2857	70.4129	90.8656	91.3165
		95% trim	Leaky ReLU	0.01	40*40	500	500	95.8473	99.9841	96.1422	70.373	87.6614	89.1541
		95% trim	Leaky ReLU	0.01	50*50	50	50	94.9466	99.8884	95.664	67.9739	86.9759	87.6975
		95% trim	Leaky ReLU	0.01	50*50	50	100	93.9264	99.8804	96.6045	68.755	87.8766	87.5406
		95% trim	Leaky ReLU	0.01	50*50	50	500	94.5162	99.8406	96.0386	69.7354	86.8404	87.4286
		95% trim	Leaky ReLU	0.01	50*50	100	50	94.3727	100	95.8234	69.7912	86.9201	86.409
		95% trim	Leaky ReLU	0.01	50*50	100	100	94.7394	99.9522	96.469	68.6912	87.3505	86.958
		95% trim	Leaky ReLU	0.01	50*50	100	500	96.2219	99.992	96.19	69.831	87.2868	90.9244
		95% trim	Leaky ReLU	0.01	50*50	200	50	94.4365	100	96.3574	67.7746	89.3034	86.1513
		95% trim	Leaky ReLU	0.01	50*50	200	100	95.1937	99.9761	95.8473	69.8788	89.0882	91.7535
		95% trim	Leaky ReLU	0.01	50*50	200	500	95.0582	99.9681	95.2893	69.6477	88.5143	91.7423
		95% trim	Leaky ReLU	0.01	50*50	500	50	96.8277	99.9841	96.0545	67.1369	89.2874	87.5966
		95% trim	Leaky ReLU	0.01	50*50	500	100	94.8589	99.9681	96.0864	68.1811	90.2838	88.7843
		95% trim	Leaky ReLU	0.01	50*50	500	500	95.648	99.9283	96.5088	68.9144	90.0925	87.5182
		95% trim	Leaky ReLU	0.01	60*60	50	50	93.6872	99.992	95.4567	67.1688	86.3542	91.2605
		95% trim	Leaky ReLU	0.01	60*60	50	100	96.0944	100	95.3531	67.4478	89.0961	88.2017
		95% trim	Leaky ReLU	0.01	60*60	50	500	94.5401	100	95.64	68.2608	87.6694	89.9384
		95% trim	Leaky ReLU	0.01	60*60	100	50	94.6995	99.9203	95.8313	67.9659	86.0115	81.4566
		95% trim	Leaky ReLU	0.01	60*60	100	100	95.7596	100	95.6719	67.5195	87.0636	86.4538
		95% trim	Leaky ReLU	0.01	60*60	100	500	94.9944	99.9522	95.1698	70.9389	89.7338	87.4734
		95% trim	Leaky ReLU	0.01	60*60	200	50	94.4763	100	94.8191	65.4392	88.0041	86.7003
		95% trim	Leaky ReLU	0.01	60*60	200	100	94.5082	99.9761	96.3733	67.1051	88.044	90.3305
		95% trim	Leaky ReLU	0.01	60*60	200	500	95.385	99.9601	94.4763	69.0897	88.7056	89.3445
		95% trim	Leaky ReLU	0.01	60*60	500	50	94.3647	99.9522	96.9154	62.9284	87.239	89.4118
		95% trim	Leaky ReLU	0.01	60*60	500	100	93.209	99.992	96.2139	69.1376	87.5179	85.9944
		95% trim	Leaky ReLU	0.01	60*60	500	500	95.7755	99.992	96.469	68.9941	89.7657	80
		90% trim	ReLU	0.001	40*40	50	50	96.1263	99.9283	94.293	70.9549	88.7056	86.521
		90% trim	ReLU	0.001	40*40	50	100	94.1894	99.9283	93.8387	68.4043	87.3187	88.8067
		90% trim	ReLU	0.001	40*40	50	500	94.0459	99.7768	93.4481	69.0499	87.9484	90.6779
		90% trim	ReLU	0.001	40*40	100	50	95.7198	99.9362	94.6915	69.2332	88.8889	90.1289
		90% trim	ReLU	0.001	40*40	100	100	94.6676	99.8725	94.5321	69.6078	88.7693	90.6218
		90% trim	ReLU	0.001	40*40	100	500	94.6357	99.8087	92.946	69.3448	87.9643	87.7871
		90% trim	ReLU	0.001	40*40	200	50	96.2139	99.9362	95.5205	70.1339	90.1881	90.3754
		90% trim	ReLU	0.001	40*40	200	100	96.4371	99.8565	94.7792	70.1259	89.415	87.4174
		90% trim	ReLU	0.001	40*40	200	500	94.8191	99.8725	93.8546	70.4129	88.7295	90.028
		90% trim	ReLU	0.001	40*40	500	50	96.5965	99.8486	94.6437	69.4405	89.5106	89.7927
		90% trim	ReLU	0.001	40*40	500	100	95.8951	99.8246	95.0582	69.1695	90.3077	89.0196
		90% trim	ReLU	0.001	40*40	500	500	95.0422	99.8246	94.293	70.3172	90.0367	88.6723
		90% trim	ReLU	0.001	50*50	50	50	93.8546	99.8964	93.9024	68.5557	87.4303	87.3389
		90% trim	ReLU	0.001	50*50	50	100	93.8307	99.8804	91.7105	68.7789	89.1041	89.0196
		90% trim	ReLU	0.001	50*50	50	500	92.8105	99.8087	91.1685	69.4883	87.1274	87.563
		90% trim	ReLU	0.001	50*50	100	50	95.2734	99.9123	93.9104	68.6753	88.0281	86.7451
		90% trim	ReLU	0.001	50*50	100	100	94.3966	99.9362	93.7829	69.0818	88.0759	87.7311
		90% trim	ReLU	0.001	50*50	100	500	94.5959	99.8406	92.7786	69.7035	88.9447	89.0756
		90% trim	ReLU	0.001	50*50	200	50	95.4647	99.8884	94.1495	69.0579	89.5744	86.3417
		90% trim	ReLU	0.001	50*50	200	100	93.6394	99.8645	92.9938	69.1774	90.5707	87.3838
		90% trim	ReLU	0.001	50*50	200	500	93.7111	99.8486	92.4518	68.3007	88.2433	88.2241
		90% trim	ReLU	0.001	50*50	500	50	95.3611	99.8406	94.0061	69.8071	90.3077	88.7507
		90% trim	ReLU	0.001	50*50	500	100	96.3494	99.8246	94.3886	68.6514	90.0765	91.6303
		90% trim	ReLU	0.001	50*50	500	500	95.8951	99.8326	93.6075	69.56	89.407	89.6022
		90% trim	ReLU	0.001	60*60	50	50	94.301	99.9123	94.6198	67.6471	88.4106	86.0952
		90% trim	ReLU	0.001	60*60	50	100	92.3482	99.8964	94.3488	68.763	87.9802	88.6387
		90% trim	ReLU	0.001	60*60	50	500	93.5438	99.8486	93.9582	68.213	87.773	88.8179
		90% trim	ReLU	0.001	60*60	100	50	93.7351	99.9362	94.7234	69.3926	88.7056	86.6331
		90% trim	ReLU	0.001	60*60	100	100	94.835	99.7609	94.1814	68.6912	89.0722	86.0056
		90% trim	ReLU	0.001	60*60	100	500	93.5996	99.8007	94.2053	70.3651	87.7571	87.6975
		90% trim	ReLU	0.001	60*60	200	50	95.6321	99.9044	94.1655	69.026	88.2911	87.1709
		90% trim	ReLU	0.001	60*60	200	100	95.4248	99.8326	96.206	67.9978	89.5345	88.9972
		90% trim	ReLU	0.001	60*60	200	500	94.4763	99.8087	94.5162	69.9665	88.0281	88.8627
		90% trim	ReLU	0.001	60*60	500	50	96.2299	99.8565	95.122	71.4969	90.8576	87.8095
		90% trim	ReLU	0.001	60*60	500	100	95.1379	99.8406	95.3212	70.7078	89.7019	88.8067
		90% trim	ReLU	0.001	60*60	500	500	94.3568	99.7689	94.5959	70.6919	89.0244	88.9412
		90% trim	ReLU	0.0001	40*40	50	50	93.3046	99.9044	91.6786	67.8224	84.513	86.0952
		90% trim	ReLU	0.0001	40*40	50	100	91.838	99.8167	92.7228	68.4362	82.8232	84.5826
		90% trim	ReLU	0.0001	40*40	50	500	89.8454	99.6094	90.3156	68.0217	78.519	79.3613
		90% trim	ReLU	0.0001	40*40	100	50	93.7351	99.8884	93.1054	67.8702	86.1789	87.9888
		90% trim	ReLU	0.0001	40*40	100	100	93.9024	99.8804	92.651	67.4239	84.6963	86.8908
		90% trim	ReLU	0.0001	40*40	100	500	91.4475	99.6891	91.1605	67.8384	80.7429	82.084
		90% trim	ReLU	0.0001	40*40	200	50	95.4886	99.8884	94.03	67.7826	87.6056	88.0112
		90% trim	ReLU	0.0001	40*40	200	100	94.4684	99.8725	93.209	69.2731	86.3861	89.4454
		90% trim	ReLU	0.0001	40*40	200	500	92.922	99.729	92.2605	67.4956	82.5761	84.2801
		90% trim	ReLU	0.0001	40*40	500	50	96.0864	99.9123	94.5002	68.6753	88.8411	90.0392
		90% trim	ReLU	0.0001	40*40	500	100	96.0705	99.8884	94.1974	68.9861	88.2273	90.028
		90% trim	ReLU	0.0001	40*40	500	500	93.7988	99.729	93.0257	67.6072	84.7601	86.7339
		90% trim	ReLU	0.0001	50*50	50	50	93.0416	99.8964	91.8301	67.8941	85.1267	88.605
		90% trim	ReLU	0.0001	50*50	50	100	92.2844	99.8486	91.2243	68.8666	82.9826	85.1653
		90% trim	ReLU	0.0001	50*50	50	500	90.9533	99.6254	90.212	68.1412	80.6472	80.8067
		90% trim	ReLU	0.0001	50*50	100	50	93.7988	99.8964	93.4242	68.7311	86.0194	87.07
		90% trim	ReLU	0.0001	50*50	100	100	93.759	99.8804	91.8938	68.1572	85.0072	86.9244
		90% trim	ReLU	0.0001	50*50	100	500	91.7663	99.7131	91.4714	67.9579	81.3965	84.1793
		90% trim	ReLU	0.0001	50*50	200	50	95.7995	99.8964	93.1452	70.381	88.0998	88.9748
		90% trim	ReLU	0.0001	50*50	200	100	94.2452	99.8725	93.0177	68.8506	86.5933	87.1933
		90% trim	ReLU	0.0001	50*50	200	500	93.0018	99.721	91.9656	67.7985	83.6123	85.3557
		90% trim	ReLU	0.0001	50*50	500	50	96.7001	99.8804	93.6633	67.7029	88.5701	88.3025
		90% trim	ReLU	0.0001	50*50	500	100	95.8871	99.8804	93.5198	68.8187	87.6773	87.888
		90% trim	ReLU	0.0001	50*50	500	500	94.3807	99.729	92.6909	67.5833	84.7282	87.0364
		90% trim	ReLU	0.0001	60*60	50	50	92.4119	99.8884	92.8423	68.9144	86.2107	88.1345
		90% trim	ReLU	0.0001	60*60	50	100	92.4677	99.8565	92.4518	68.0137	85.0311	87.4174
		90% trim	ReLU	0.0001	60*60	50	500	91.0569	99.7131	90.6823	67.8543	81.261	82.6667
		90% trim	ReLU	0.0001	60*60	100	50	95.0662	99.8804	93.217	69.1934	87.7969	87.4398
		90% trim	ReLU	0.0001	60*60	100	100	93.3286	99.8964	93.201	68.3644	86.6013	87.4398
		90% trim	ReLU	0.0001	60*60	100	500	91.5112	99.7051	91.6069	67.8623	82.0819	85.0308
		90% trim	ReLU	0.0001	60*60	200	50	95.0263	99.8884	94.2213	69.2253	88.6019	88.8964
		90% trim	ReLU	0.0001	60*60	200	100	93.9503	99.8645	94.301	69.1774	87.2868	88.1008
		90% trim	ReLU	0.0001	60*60	200	500	92.3482	99.737	91.9974	67.5674	83.9072	85.9384
		90% trim	ReLU	0.0001	60*60	500	50	95.2415	99.9283	94.5959	68.8745	88.6976	89.9832
		90% trim	ReLU	0.0001	60*60	500	100	95.7676	99.8804	94.5162	69.3687	88.2911	89.2213
		90% trim	ReLU	0.0001	60*60	500	500	94.1256	99.7529	93.0097	67.5594	85.7564	88.0336
		90% trim	ReLU	0.01	40*40	50	50	94.7792	99.8804	93.5039	68.2927	87.7013	84
		90% trim	ReLU	0.01	40*40	50	100	95.9031	99.7689	94.7952	68.2927	89.5186	81.0196
		90% trim	ReLU	0.01	40*40	50	500	93.5039	99.8007	93.6713	69.2571	88.7135	89.4566
		90% trim	ReLU	0.01	40*40	100	50	94.7314	99.8007	94.7234	68.2927	87.3027	84.2353
		90% trim	ReLU	0.01	40*40	100	100	94.7075	99.8326	94.7553	68.2927	87.5817	87.1597
		90% trim	ReLU	0.01	40*40	100	500	95.369	99.7131	94.9227	67.2166	89.9968	86.2073
		90% trim	ReLU	0.01	40*40	200	50	94.8509	99.729	94.4126	68.2927	86.5375	86.3529
		90% trim	ReLU	0.01	40*40	200	100	90.6424	99.6573	94.6278	68.2289	87.5658	85.6022
		90% trim	ReLU	0.01	40*40	200	500	95.5842	99.7051	95.114	69.1216	91.2243	87.6078
		90% trim	ReLU	0.01	40*40	500	50	95.5524	99.6971	94.9067	68.2927	87.8208	84.8852
		90% trim	ReLU	0.01	40*40	500	100	94.835	99.8246	95.0741	68.2927	86.9839	85.2773
		90% trim	ReLU	0.01	40*40	500	500	95.6719	99.7768	95.4487	71.8635	90.6903	89.6471
		90% trim	ReLU	0.01	50*50	50	50	93.6155	99.9203	94.6995	68.2927	87.9005	88.8739
		90% trim	ReLU	0.01	50*50	50	100	94.8589	99.8884	93.4641	68.2927	87.9802	88.1793
		90% trim	ReLU	0.01	50*50	50	500	92.8503	99.7131	93.472	69.4086	88.7853	91.2157
		90% trim	ReLU	0.01	50*50	100	50	94.556	99.7449	92.5076	68.2927	85.5332	85.9272
		90% trim	ReLU	0.01	50*50	100	100	94.7154	99.8406	93.3525	68.2927	88.3788	86.1176
		90% trim	ReLU	0.01	50*50	100	500	93.6713	99.7529	93.4959	72.82	90.3077	88.5826
		90% trim	ReLU	0.01	50*50	200	50	94.8111	99.7051	92.0293	68.2927	87.0716	82.9356
		90% trim	ReLU	0.01	50*50	200	100	95.5524	99.6254	94.6597	71.7201	88.2034	86.0168
		90% trim	ReLU	0.01	50*50	200	500	96.0306	99.5536	93.7749	72.6686	88.3708	90.521
		90% trim	ReLU	0.01	50*50	500	50	92.8583	99.4819	95.1698	68.2927	82.9029	90.2633
		90% trim	ReLU	0.01	50*50	500	100	95.2256	99.6652	94.1017	68.2927	86.2665	87.1933
		90% trim	ReLU	0.01	50*50	500	500	95.3372	99.8007	95.2335	70.8911	86.8325	88.1345
		90% trim	ReLU	0.01	60*60	50	50	95.6002	99.8326	93.3843	68.2927	87.6853	85.1653
		90% trim	ReLU	0.01	60*60	50	100	93.4641	99.6891	94.285	68.2927	87.6136	88.0224
		90% trim	ReLU	0.01	60*60	50	500	93.3126	99.7848	93.8387	69.7991	87.8846	90.1401
		90% trim	ReLU	0.01	60*60	100	50	94.3249	99.729	95.1379	68.2927	89.6142	83.3053
		90% trim	ReLU	0.01	60*60	100	100	94.2133	99.721	95.5763	68.2927	87.9643	82.958
		90% trim	ReLU	0.01	60*60	100	500	93.759	99.8007	95.7038	69.0738	89.3671	89.2997
		90% trim	ReLU	0.01	60*60	200	50	93.5677	99.737	95.656	68.2927	85.7245	83.4062
		90% trim	ReLU	0.01	60*60	200	100	94.843	99.8246	95.4806	68.2927	87.8686	87.5294
		90% trim	ReLU	0.01	60*60	200	500	95.2415	99.7131	95.5205	68.2927	87.6375	87.7759
		90% trim	ReLU	0.01	60*60	500	50	95.3611	99.721	95.0741	68.2927	85.8042	86.1401
		90% trim	ReLU	0.01	60*60	500	100	92.388	99.721	96.6762	68.2927	84.4094	86.9356
		90% trim	ReLU	0.01	60*60	500	500	94.293	99.9283	95.5683	68.2927	89.4628	86.7003
		90% trim	Leaky ReLU	0.001	40*40	50	50	96.732	99.9283	94.3886	69.8948	88.3788	86.2521
		90% trim	Leaky ReLU	0.001	40*40	50	100	96.3893	99.9123	94.3647	69.9426	89.5823	89.6807
		90% trim	Leaky ReLU	0.001	40*40	50	500	95.4886	99.8007	93.6713	69.847	87.9723	87.3053
		90% trim	Leaky ReLU	0.001	40*40	100	50	96.0705	99.8804	94.8908	71.2498	90.6424	87.7199
		90% trim	Leaky ReLU	0.001	40*40	100	100	96.5567	99.8087	94.3169	71.1462	90.0367	89.7031
		90% trim	Leaky ReLU	0.001	40*40	100	500	96.1821	99.8884	92.8184	69.4723	88.5701	88.8403
		90% trim	Leaky ReLU	0.001	40*40	200	50	96.3494	99.8326	95.1777	68.3564	90.5946	85.7815
		90% trim	Leaky ReLU	0.001	40*40	200	100	96.1023	99.8167	94.5162	70.5962	90.1722	90.0504
		90% trim	Leaky ReLU	0.001	40*40	200	500	94.9147	99.9044	94.6437	69.5122	88.9527	89.1877
		90% trim	Leaky ReLU	0.001	40*40	500	50	97.2342	99.8406	95.3212	71.1701	90.9294	87.4846
		90% trim	Leaky ReLU	0.001	40*40	500	100	96.8038	99.6732	95.6321	70.915	89.9251	90.2745
		90% trim	Leaky ReLU	0.001	40*40	500	500	94.6836	99.7768	94.4524	68.9463	89.399	89.2773
		90% trim	Leaky ReLU	0.001	50*50	50	50	95.9908	99.9442	94.03	69.1695	89.6939	88.493
		90% trim	Leaky ReLU	0.001	50*50	50	100	96.198	99.8964	93.7988	70.118	90.1483	88.8515
		90% trim	Leaky ReLU	0.001	50*50	50	500	95.8632	99.7609	93.1691	70.118	88.6498	88.5938
		90% trim	Leaky ReLU	0.001	50*50	100	50	96.6045	99.8565	92.5873	70.2535	90.1004	88.9972
		90% trim	Leaky ReLU	0.001	50*50	100	100	95.7676	99.8167	95.2415	68.763	88.1715	87.1036
		90% trim	Leaky ReLU	0.001	50*50	100	500	94.285	99.8725	93.4481	67.8304	87.8208	88.986
		90% trim	Leaky ReLU	0.001	50*50	200	50	95.4886	99.8167	95.1618	71.4411	90.6982	90.0616
		90% trim	Leaky ReLU	0.001	50*50	200	100	96.3255	99.8884	95.7516	70.2853	90.3396	88.0224
		90% trim	Leaky ReLU	0.001	50*50	200	500	95.5763	99.8087	94.022	69.9107	88.7454	88
		90% trim	Leaky ReLU	0.001	50*50	500	50	96.7639	99.8326	94.4843	70.3093	90.4751	88.5826
		90% trim	Leaky ReLU	0.001	50*50	500	100	96.4929	99.8246	94.014	70.0303	91.0569	87.5854
		90% trim	Leaky ReLU	0.001	50*50	500	500	95.5603	99.8326	95.0024	69.8788	89.7816	90.1625
		90% trim	Leaky ReLU	0.001	60*60	50	50	95.5524	99.8486	94.7473	70.8832	90.6743	86.7563
		90% trim	Leaky ReLU	0.001	60*60	50	100	95.6241	99.7768	94.1734	69.5122	89.6142	87.5518
		90% trim	Leaky ReLU	0.001	60*60	50	500	94.1336	99.8246	94.3329	68.5956	87.9484	88.5042
		90% trim	Leaky ReLU	0.001	60*60	100	50	94.6517	99.7928	94.1176	71.2498	89.8693	87.5294
		90% trim	Leaky ReLU	0.001	60*60	100	100	95.4647	99.7848	94.7234	69.3129	89.399	87.3389
		90% trim	Leaky ReLU	0.001	60*60	100	500	95.2415	99.8326	94.2292	69.2013	88.307	90.6667
		90% trim	Leaky ReLU	0.001	60*60	200	50	96.0306	99.8326	94.301	70.2853	90.5548	87.6639
		90% trim	Leaky ReLU	0.001	60*60	200	100	95.1459	99.8087	94.7154	69.6238	90.1004	88.2017
		90% trim	Leaky ReLU	0.001	60*60	200	500	95.369	99.7449	94.022	69.281	88.8251	86.4762
		90% trim	Leaky ReLU	0.001	60*60	500	50	96.1023	99.9203	95.1538	70.5006	90.8417	82.4762
		90% trim	Leaky ReLU	0.001	60*60	500	100	96.4291	99.7928	95.6082	69.7433	90.212	87.7647
		90% trim	Leaky ReLU	0.001	60*60	500	500	95.5524	99.8007	94.827	69.4644	89.9888	89.5126
		90% trim	Leaky ReLU	0.0001	40*40	50	50	93.201	99.9283	93.0336	67.8065	84.4652	86.4762
		90% trim	Leaky ReLU	0.0001	40*40	50	100	92.2764	99.8804	92.7467	67.3681	83.2297	84.8739
		90% trim	Leaky ReLU	0.0001	40*40	50	500	90.4511	99.6573	89.8055	67.9181	79.077	79.7871
		90% trim	Leaky ReLU	0.0001	40*40	100	50	94.8828	99.8725	93.0177	67.1608	86.8883	87.9216
		90% trim	Leaky ReLU	0.0001	40*40	100	100	93.9981	99.8804	92.6829	67.663	85.0151	87.2941
		90% trim	Leaky ReLU	0.0001	40*40	100	500	91.7982	99.6971	91.4634	67.7188	81.6914	83.2269
		90% trim	Leaky ReLU	0.0001	40*40	200	50	95.2415	99.8725	93.9104	69.7035	87.9802	89.3221
		90% trim	Leaky ReLU	0.0001	40*40	200	100	94.6756	99.8725	93.2329	69.1615	86.9361	87.451
		90% trim	Leaky ReLU	0.0001	40*40	200	500	92.651	99.737	92.2206	67.1688	83.3891	85.2885
		90% trim	Leaky ReLU	0.0001	40*40	500	50	96.2857	99.8804	94.4604	68.3644	89.2396	89.1653
		90% trim	Leaky ReLU	0.0001	40*40	500	100	96.0625	99.8964	94.7314	68.8267	88.5302	90.028
		90% trim	Leaky ReLU	0.0001	40*40	500	500	94.0858	99.7131	93.4481	67.5195	84.7441	86.5546
		90% trim	Leaky ReLU	0.0001	50*50	50	50	93.3445	99.9044	92.4199	68.4601	86.2586	87.9888
		90% trim	Leaky ReLU	0.0001	50*50	50	100	92.0692	99.9044	92.4597	68.1731	83.8993	85.535
		90% trim	Leaky ReLU	0.0001	50*50	50	500	91.6866	99.7131	90.0845	67.6869	80.7907	81.972
		90% trim	Leaky ReLU	0.0001	50*50	100	50	95.0741	99.8804	92.667	68.9542	86.6252	88.0112
		90% trim	Leaky ReLU	0.0001	50*50	100	100	93.8626	99.8725	92.7945	69.0897	85.5014	86.577
		90% trim	Leaky ReLU	0.0001	50*50	100	500	92.125	99.737	91.0888	67.7746	81.7153	84.1793
		90% trim	Leaky ReLU	0.0001	50*50	200	50	94.5799	99.8725	93.5358	68.8985	88.5541	88.8179
		90% trim	Leaky ReLU	0.0001	50*50	200	100	95.1618	99.8804	93.0018	69.2093	88.3469	87.4062
		90% trim	Leaky ReLU	0.0001	50*50	200	500	92.9699	99.7689	92.125	67.129	83.2217	84.9972
		90% trim	Leaky ReLU	0.0001	50*50	500	50	96.1741	99.8725	91.9417	69.2332	89.0563	88.4594
		90% trim	Leaky ReLU	0.0001	50*50	500	100	96.3654	99.8725	94.1894	67.9659	88.2831	88.0336
		90% trim	Leaky ReLU	0.0001	50*50	500	500	94.3807	99.737	92.8105	67.2406	85.0949	86.9804
		90% trim	Leaky ReLU	0.0001	60*60	50	50	93.2967	99.8087	94.5481	69.026	86.7368	86.9916
		90% trim	Leaky ReLU	0.0001	60*60	50	100	92.4757	99.8884	93.3764	68.1014	86.2028	86.5658
		90% trim	Leaky ReLU	0.0001	60*60	50	500	91.7105	99.729	91.2163	68.1492	81.6196	84.0224
		90% trim	Leaky ReLU	0.0001	60*60	100	50	94.4843	99.8486	93.6394	68.9463	87.223	88.0784
		90% trim	Leaky ReLU	0.0001	60*60	100	100	94.6278	99.8884	93.7988	69.56	86.7767	87.9664
		90% trim	Leaky ReLU	0.0001	60*60	100	500	92.1808	99.737	91.8062	67.3362	84.1543	85.3557
		90% trim	Leaky ReLU	0.0001	60*60	200	50	95.3611	99.8645	93.6075	69.839	88.7693	88.1345
		90% trim	Leaky ReLU	0.0001	60*60	200	100	94.6836	99.8884	93.8307	70.0701	87.8686	89.2101
		90% trim	Leaky ReLU	0.0001	60*60	200	500	92.9141	99.729	92.133	67.8144	84.6485	86.8347
		90% trim	Leaky ReLU	0.0001	60*60	500	50	95.927	99.8804	93.7669	69.839	89.128	90.7451
		90% trim	Leaky ReLU	0.0001	60*60	500	100	95.4806	99.9044	94.4923	70.6042	88.7534	88.8852
		90% trim	Leaky ReLU	0.0001	60*60	500	500	94.564	99.721	93.0894	68.2847	86.7926	87.7087
		90% trim	Leaky ReLU	0.01	40*40	50	50	92.4279	99.5377	95.5842	69.5999	89.662	88.5714
		90% trim	Leaky ReLU	0.01	40*40	50	100	94.8828	99.7449	94.0379	68.9383	90.1483	85.9944
		90% trim	Leaky ReLU	0.01	40*40	50	500	94.03	99.7928	94.4046	68.5159	88.6577	89.0756
		90% trim	Leaky ReLU	0.01	40*40	100	50	95.4886	99.8087	95.2654	71.5049	83.7159	85.8711
		90% trim	Leaky ReLU	0.01	40*40	100	100	96.2777	99.8167	94.8111	69.4006	88.4186	85.0756
		90% trim	Leaky ReLU	0.01	40*40	100	500	95.4966	99.6812	94.2611	70.6839	89.662	87.619
		90% trim	Leaky ReLU	0.01	40*40	200	50	96.206	99.8884	95.5603	68.8745	86.673	84.7171
		90% trim	Leaky ReLU	0.01	40*40	200	100	94.0619	99.8167	95.4248	70.1658	88.3628	89.1317
		90% trim	Leaky ReLU	0.01	40*40	200	500	95.8074	99.7609	95.5125	71.0904	90.5388	88.3697
		90% trim	Leaky ReLU	0.01	40*40	500	50	94.8828	99.6971	94.1017	69.9028	87.4462	86.8796
		90% trim	Leaky ReLU	0.01	40*40	500	100	95.5922	99.8326	94.4684	71.0984	86.96	88.6947
		90% trim	Leaky ReLU	0.01	40*40	500	500	96.5328	99.7609	95.6161	71.7998	89.7418	90.7787
		90% trim	Leaky ReLU	0.01	50*50	50	50	92.396	99.8007	93.8227	68.747	86.3144	86.6218
		90% trim	Leaky ReLU	0.01	50*50	50	100	92.8981	99.8246	91.8859	69.5839	87.7252	84.7283
		90% trim	Leaky ReLU	0.01	50*50	50	500	92.2525	99.6732	94.5799	69.9187	90.2758	88.2017
		90% trim	Leaky ReLU	0.01	50*50	100	50	95.4487	99.4421	93.3684	69.1296	82.1696	89.1204
		90% trim	Leaky ReLU	0.01	50*50	100	100	93.9264	99.8167	94.7154	68.4043	88.307	86.9244
		90% trim	Leaky ReLU	0.01	50*50	100	500	94.7473	99.7609	93.8387	71.5128	88.578	88.6499
		90% trim	Leaky ReLU	0.01	50*50	200	50	94.5082	99.8486	95.0821	69.0499	88.8969	87.1597
		90% trim	Leaky ReLU	0.01	50*50	200	100	94.9705	99.721	93.8307	70.2375	87.0716	84.986
		90% trim	Leaky ReLU	0.01	50*50	200	500	95.2893	99.8167	94.0858	72.294	88.8889	89.0196
		90% trim	Leaky ReLU	0.01	50*50	500	50	95.0263	99.8007	92.6192	68.6753	84.8876	85.2997
		90% trim	Leaky ReLU	0.01	50*50	500	100	95.664	99.8565	94.6198	69.297	84.8318	88.0672
		90% trim	Leaky ReLU	0.01	50*50	500	500	95.5205	99.7689	94.6437	69.7354	89.7896	87.2493
		90% trim	Leaky ReLU	0.01	60*60	50	50	94.1894	99.721	95.393	69.1296	85.2224	88.6499
		90% trim	Leaky ReLU	0.01	60*60	50	100	94.1974	99.8167	95.1299	69.2173	87.6295	86.5434
		90% trim	Leaky ReLU	0.01	60*60	50	500	93.9742	99.5776	94.2213	69.3129	88.3947	88.2577
		90% trim	Leaky ReLU	0.01	60*60	100	50	95.5683	99.8645	94.6437	68.484	89.4468	84.3473
		90% trim	Leaky ReLU	0.01	60*60	100	100	94.1097	99.7768	92.6192	69.2013	87.215	88.056
		90% trim	Leaky ReLU	0.01	60*60	100	500	95.0502	99.6573	94.7792	70.6361	88.5462	88.2577
		90% trim	Leaky ReLU	0.01	60*60	200	50	94.1495	99.7449	95.4169	69.6318	87.7252	86.6891
		90% trim	Leaky ReLU	0.01	60*60	200	100	94.4604	99.8645	95.2096	67.5674	82.9826	88.7955
		90% trim	Leaky ReLU	0.01	60*60	200	500	93.1054	99.8167	96.0465	71.0187	89.5345	88.0672
		90% trim	Leaky ReLU	0.01	60*60	500	50	94.6915	99.8007	96.0306	68.4202	84.4811	86.3081
		90% trim	Leaky ReLU	0.01	60*60	500	100	94.7314	99.6732	94.7394	69.2332	85.8282	86.1849
		90% trim	Leaky ReLU	0.01	60*60	500	500	95.8712	99.8167	95.6879	67.9818	88.9925	86.7115
